# Supplementary material for: ACVIM consensus statement on the diagnosis of immune thrombocytopenia in dogs and cats
Source: PubMed Central journal article supplement — J Vet Intern Med. 2024 May 16;38(4):1958–81. doi: 10.1111/jvim.16996 (PMC11256148; doi:10.1111/jvim.16996), 2024-05-16
Supplement: JVIM-38-1958-s008.pdf [file JVIM-38-1958-s008.pdf]

### Supporting Information 3: Bibliography of studies for comorbidities

#### Studies identified via systematic search of bibliographic databases.

1. Akiyoshi, M., Hisasue, M., Neo, S., & Akiyoshi, M. (2021). Presumptive hemophagocytic syndrome associated with immune-mediated anemia in two Miniature Dachshunds. *Journal of Veterinary Medical Science*, 83(4), 689–694. <https://doi.org/10.1292/jvms.20-0566>
2. Antognoni, M. T., Veronesi, F., & Morganti, G. (2014). Natural infection of *Anaplasma platys* in dogs from Umbria region (Central Italy). *Veterinaria Italiana*, 50, 59–56. <https://doi.org/10.12834/VetIt.82.258.2>
3. Atkinson, M. (2011). IMT in spaniel after vaccination. *Vet Times*, 41(7), 1–13.
4. Bach, J. F., Mahony, O. M., Tidwell, A. S., & Rush, J. E. (2007). Brain abscess and bacterial endocarditis in a Kerry Blue Terrier with a history of immune-mediated thrombocytopenia. *Journal of Veterinary Emergency and Critical Care*, 17(4), 409–415. <https://doi.org/10.1111/j.1476-4431.2007.00245.x>
5. Best, M., & Fry, D. (2014). Primary immune-mediated thrombocytopenia and immune-mediated neutropenia suspected in a 21-week-old Maine Coon cat. *Australian Veterinary Journal*, 92(7), 250–253. <https://doi.org/10.1111/avj.12186>
6. Bexfield, N. H., Villiers, E. J., & Herrtage, M. E. (2005). Immune-mediated haemolytic anaemia and thrombocytopenia associated with *Anaplasma phagocytophilum* in a dog. *Journal of Small Animal Practice*, 46(11), 543–548. <https://doi.org/10.1111/j.1748-5827.2005.tb00284.x>
7. Bianco, D., & Hardy, R. M. (2009). Treatment of Evans' Syndrome With Human Intravenous Immunoglobulin and Leflunomide in a Diabetic Dog. *Journal of the American Animal Hospital Association*, 45(3), 147–150. <https://doi.org/10.5326/0450147>
8. Birkenheuer, A. J., Correa, M. T., Levy, M. G., & Breitschwerdt, E. B. (2005). Geographic distribution of babesiosis among dogs in the United States and association with dog bites: 150 cases (2000–2003). *Journal of the American Veterinary Medical Association*, 227(6), 942–947. <https://doi.org/10.2460/javma.2005.227.942>
9. Bloom, J. C., Blackmer, S. A., Bugelski, P. J., Sowinski, J. M., & Saunders, L. Z. (1985). Gold-induced Immune Thrombocytopenia in the Dog. *Veterinary Pathology*, 22(5), 492–499. <https://doi.org/10.1177/030098588502200509>
10. Botsch, V., Küchenhoff, H., Hartmann, K., & Hirschberger, J. (2009). Retrospective study of 871 dogs with thrombocytopenia. *Veterinary Record*, 164(21), 647–651. <https://doi.org/10.1136/vr.164.21.647>
11. Breitschwerdt, E. B., Blann, K. R., Stebbins, M. E., Muñana, K. R., Davidson, M. G., Jackson, H. A., & Willard, M. D. (2004). Clinicopathological Abnormalities and Treatment Response in 24 Dogs Seroreactive to *Bartonella vinsonii* (berkhoffii) Antigens. *Journal of the American Animal Hospital Association*, 40(2), 92–101. <https://doi.org/10.5326/0400092>
12. Bulman-Fleming, J. C., Gibson, T. W., & Kruth, S. A. (2009). Invasive cutaneous angiomatosis and thrombocytopenia in a cat. *Journal of the American Veterinary Medical Association*, 234(3), 381–384. <https://doi.org/10.2460/javma.234.3.381>
13. Cain, G. R., Cain, J. L., Turrel, J. M., Theilen, G., & Jain, N. C. (1988). Immune-mediated Hemolytic Anemia and Thrombocytopenia in a Cat after Bone Marrow Transplantation. *Veterinary Pathology*, 25(2), 161–162. <https://doi.org/10.1177/030098588802500209>
14. Cain, G. R., Champlin, R., & Jain, N. (1989). Immune thrombocytopenia in dogs after fetal liver hematopoietic cell transplantation. *Experimental Hematology*, 17(3), 287–291.

15. Callan, M. B., Werner, P., Mason, N. J., Meny, G. M., Raducha, M. G., & Henthorn, P. S. (2013). Polymorphisms in Canine Platelet Glycoproteins Identify Potential Platelet Antigens. *Comparative Medicine*, 63(4), 348–354.
16. Campbell, K. L., George, J. W., & Greene, C. E. (1984). Application of the enzyme-linked immunosorbent assay for the detection of platelet antibodies in dogs. *American Journal of Veterinary Research*, 45(12), 2561–2564.
17. Carr, A. P., Panciera, D. L., & Kidd, L. (2002). Prognostic Factors for Mortality and Thromboembolism in Canine Immune-Mediated Hemolytic Anemia: A Retrospective Study of 72 Dogs. *Journal of Veterinary Internal Medicine*, 16(5), 504–509. <https://doi.org/10.1111/j.1939-1676.2002.tb02378.x>
18. ChangWoo, L., Jeong, N. K., JungSik, L., & JeongWook, S. (1996). Systemic lupus erythematosus in a dog, suspected systemic lupus erythematosus in a dog, and autoimmune thrombocytopenic purpura hemorrhagica in a dog. *Korean Journal of Veterinary Clinical Medicine*, 13(1), 81–86.
19. Chethan, G. E., Thakur, N., Madhesh, E., Garkhal, J., Mahendran, K., De, U. K., & Dixit, S. K. (2016). Therapeutic management of Ehrlichia canis induced pancytopenia and hepatopathy in a dog. *Journal of Veterinary Parasitology*, 30(1), 28–31.
20. Chirek, A., Silaghi, C., Pfister, K., & Kohn, B. (2018). Granulocytic anaplasmosis in 63 dogs: Clinical signs, laboratory results, therapy and course of disease: Canine granulocytic anaplasmosis. *Journal of Small Animal Practice*, 59(2), 112–120. <https://doi.org/10.1111/jsap.12787>
21. Codner, E. C., Roberts, R. E., & Ainsworth, A. G. (1985). Atypical findings in 16 cases of canine ehrlichiosis. *Journal of the American Veterinary Medical Association*, 186(2), 166–169.
22. Çolakoglu, E. Ç., & Haydardedeoglu, A. E. (2019). Thrombocyte indices and plateletcrit in dogs with primary immune-mediated hemolytic anemia. *Medycyna Weterynaryjna*, 75(8), 484–486. <https://doi.org/10.21521/mw.6262>
23. Collicutt, N. B., & Garner, B. (2013). Erythrocyte dysplasia in peripheral blood smears from 5 thrombocytopenic dogs treated with vincristine sulfate. *Veterinary Clinical Pathology*, 42(4), 458–464. <https://doi.org/10.1111/vcp.12089>
24. Cooper, S. A., Huang, A. A., Raskin, R. E., Weng, H.-Y., & Scott-Moncrieff, J. C. (2016). Clinical data, clinicopathologic findings and outcome in dogs with amegakaryocytic thrombocytopenia and primary immune-mediated thrombocytopenia: Amegakaryocytic thrombocytopenia. *Journal of Small Animal Practice*, 57(3), 142–147. <https://doi.org/10.1111/jsap.12441>
25. Cortese, L., Pelagalli, A., Piantedosi, D., Cestaro, A., Di Loria, A., Lombardi, P., Avallone, L., & Ciaramella, P. (2009). Effects of therapy on haemostasis in dogs infected with Leishmania infantum, Ehrlichia canis, or both combined. *Veterinary Record*, 164(14), 433–434. <https://doi.org/10.1136/vr.164.14.433>
26. Cortese, L., Piantedosi, D., Ciaramella, P., Pero, M. E., Sica, M., Ruggiero, G., Terrazzano, G., & Mastellone, V. (2009). Secondary immune-mediated thrombocytopenia in dogs naturally infected by Leishmania infantum. *Veterinary Record*, 164(25), 778–782. <https://doi.org/10.1136/vr.164.25.778>
27. Cortese, L., Terrazzano, G., Piantedosi, D., Sica, M., Prisco, M., Ruggiero, G., & Ciaramella, P. (2011). Prevalence of anti-platelet antibodies in dogs naturally co-infected by Leishmania infantum and Ehrlichia canis. *The Veterinary Journal*, 188(1), 118–121. <https://doi.org/10.1016/j.tvjl.2010.03.015>
28. Davidow, E. B., Brainard, B., Martin, L. G., Beal, M. W., Bode, A., Ford, M. J., Ramsey, N., Fagella, A., & Jutkowitz, A. (2012). Use of fresh platelet concentrate or lyophilized platelets in thrombocytopenic dogs with clinical signs of hemorrhage: A preliminary trial in 37 dogs: Lyophilized platelets in bleeding thrombocytopenic dogs. *Journal of Veterinary Emergency and Critical Care*, 22(1), 116–125. <https://doi.org/10.1111/j.1476-4431.2011.00710.x>
29. Davis, W. M. (1984). Hapten-induced, immune-mediated thrombocytopenia in a dog. *Journal of the American Veterinary Medical Association*, 184(8), 976–977.

30. Day, M. J. (1996). Serial monitoring of clinical, haematological and immunological parameters in canine autoimmune haemolytic anaemia. *Journal of Small Animal Practice*, 37(11), 523–534. <https://doi.org/10.1111/j.1748-5827.1996.tb02313.x>
31. Day, M. J., & Penhale, W. J. (1992). Immune-mediated disease in the old English sheepdog. *Research in Veterinary Science*, 53(1), 87–92. [https://doi.org/10.1016/0034-5288\(92\)90090-O](https://doi.org/10.1016/0034-5288(92)90090-O)
32. Dircks, B. H., Schuberth, H.-J., & Mischke, R. (2009). Underlying diseases and clinicopathologic variables of thrombocytopenic dogs with and without platelet-bound antibodies detected by use of a flow cytometric assay: 83 cases (2004–2006). *Journal of the American Veterinary Medical Association*, 235(8), 960–966. <https://doi.org/10.2460/javma.235.8.960>
33. Duval, D., & Giger, U. (1996). Vaccine-Associated Immune-Mediated Hemolytic Anemia in the Dog. *Journal of Veterinary Internal Medicine*, 10(5), 290–295. <https://doi.org/10.1111/j.1939-1676.1996.tb02064.x>
34. Engelbrecht, R., Kohn, B., Leibold, W., & Giger, U. (2002). Clinical findings, diagnosis and treatment results in primary and secondary immune-mediated haemolytic anaemia in dogs. *Kleintierpraxis*, 47(5), 265–278.
35. Espadale, E., Buckley, L., Borio, S., McEwan, N., & Schmidt, V. (2018). Successful multimodal treatment of *Paecilomyces lilacinus* infection in a dog. *Veterinary Record Case Reports*, 6(2). <https://doi.org/10.1136/vetreccr-2018-000627>
36. Fathi, E., & Jamshidi, S. (2014). Follow-up, diagnosis, clinical evidence, laboratory evaluation, and treatment of Idiopathic thrombocytopenia using human Intravenous Immunglobulin in a terrier dog. *Iranian Journal of Veterinary Science and Technology*, 6(1), 64–70.
37. Feldman, B. F. (1996). Demographics of canine immune-mediated haemolytic anaemia in the Southeastern United States. *Comparative Haematology International*, 6(1), 42–45. <https://doi.org/10.1007/BF00368101>
38. Feldman, B. F., Handagama, P., & Lubberink, A. A. (1985). Splenectomy as adjunctive therapy for immune-mediated thrombocytopenia and hemolytic anemia in the dog. *Journal of the American Veterinary Medical Association*, 187(6), 617–619.
39. França, R. T., Pillat, M. M., da Silva, C. B., Schafer, A. S., Dornelles, G. L., Costa, M. M., Chaves, R. O., de Andrade, C. M., Erhardt, M. M., Antoziazzi, A. Q., Ulrich, H., da Silva, A. S., & Lopes, S. T. dos A. (2018). Surface immunoglobulins of erythrocytes and platelets in dogs naturally infected by *Rangelia vitalii*. *Microbial Pathogenesis*, 121, 245–251. <https://doi.org/10.1016/j.micpath.2018.05.036>
40. Friedenber, S. G., Buhrman, G., Chdid, L., Olby, N. J., Olivry, T., Guillaumin, J., O’Toole, T., Goggs, R., Kennedy, L. J., Rose, R. B., & Meurs, K. M. (2016). Evaluation of a DLA-79 allele associated with multiple immune-mediated diseases in dogs. *Immunogenetics*, 68(3), 205–217. <https://doi.org/10.1007/s00251-015-0894-6>
41. Gaunt, S., Beall, M., Stillman, B., Lorentzen, L., Diniz, P., Chandrashekar, R., & Breitschwerdt, E. (2010). Experimental infection and co-infection of dogs with *Anaplasma platys* and *Ehrlichia canis*: Hematologic, serologic and molecular findings. *Parasites & Vectors*, 3(33). <https://doi.org/10.1186/1756-3305-3-33>
42. Giannuzzi, A. P., De Simone, A., Ricciardi, M., & Gernone, F. (2014). Presumptive Ischemic Brain Infarction in a Dog with Evans’ Syndrome. *Case Reports in Veterinary Medicine*, 2014, 1–8. <https://doi.org/10.1155/2014/456524>
43. Goddard, A., Leisewitz, A. L., Kristensen, A. T., & Schoeman, J. P. (2015). Platelet activation and platelet–leukocyte interaction in dogs naturally infected with *Babesia rossi*. *The Veterinary Journal*, 205(3), 387–392. <https://doi.org/10.1016/j.tvjl.2015.05.008>
44. Goggs, R., Boag, A. K., & Chan, D. L. (2008). Concurrent immune-mediated haemolytic anaemia and severe thrombocytopenia in 21 dogs. *Veterinary Record*, 163(11), 323–327. <https://doi.org/10.1136/vr.163.11.323>

45. Gonde, S. (2017). Clinico-haemato-biochemical changes in naturally occurring canine babesiosis in Punjab, India. *Malaysian Journal of Veterinary Research*, 8(1), 37–44.
46. Goodman, R. A., & Breitschwerdt, E. B. (2005). Clinicopathologic findings in dogs seroreactive to *Bartonella henselae* antigens. *American Journal of Veterinary Research*, 66(12), 2060–2064. <https://doi.org/10.2460/ajvr.2005.66.2060>
47. Gould, S. M., & McInnes, E. L. (1999). Immune-mediated thrombocytopenia associated with *Angiostrongylus vasorum* infection in a dog. *Journal of Small Animal Practice*, 40(5), 227–232. <https://doi.org/10.1111/j.1748-5827.1999.tb03068.x>
48. Greisen, A. (2008). Leishmania as a cause of Evans syndrome in a Greek street dog. *Dansk Veterinartidsskrift*, 91(5), 8–11.
49. Grindem, C. B., Breitschwerdt, E. B., Corbett, W. T., & Jans, H. E. (1991). Epidemiologic Survey of Thrombocytopenia in Dogs: A Report on 987 Cases. *Veterinary Clinical Pathology*, 20(2), 38–43. <https://doi.org/10.1111/j.1939-165X.1991.tb00566.x>
50. Grindem, C., Breitschwerdt, E., Perkins, P., Cullins, L., Thomas, T., & Hegarty, B. (1999). Platelet-associated immunoglobulin (antiplatelet antibody) in canine Rocky Mountain spotted fever and ehrlichiosis. *Journal of the American Animal Hospital Association*, 35(1), 56–61. <https://doi.org/10.5326/15473317-35-1-56>
51. Hanzlíček, D., & Bürglová, A. (2012). Non-regenerative immune-mediated haemolytic anaemia in dogs—A description of three cases treated with human immunoglobulin. *Veterinářství*, 62, 343–347.
52. Harrus, S., Day, M. J., Waner, T., & Bark, H. (2001). Presence of immune-complexes, and absence of antinuclear antibodies, in sera of dogs naturally and experimentally infected with *Ehrlichia canis*. *Veterinary Microbiology*, 83(4), 343–349. [https://doi.org/10.1016/S0378-1135\(01\)00431-X](https://doi.org/10.1016/S0378-1135(01)00431-X)
53. Harrus, S., Waner, T., Eldor, A., Zwang, E., & Bark, H. (1996). Platelet dysfunction associated with experimental acute canine ehrlichiosis. *Veterinary Record*, 139(12), 290–293. <https://doi.org/10.1136/vr.139.12.290>
54. Harrus, S., Waner, T., Keysary, A., Aroch, I., Voet, H., & Bark, H. (1998). Investigation of splenic functions in canine monocytic ehrlichiosis. *Veterinary Immunology and Immunopathology*, 62(1), 15–27. [https://doi.org/10.1016/S0165-2427\(97\)00127-X](https://doi.org/10.1016/S0165-2427(97)00127-X)
55. Harrus, S., Waner, T., Weiss, D. J., Keysary, A., & Bark, H. (1996). Kinetics of serum antiplatelet antibodies in experimental acute canine ehrlichiosis. *Veterinary Immunology and Immunopathology*, 51(1–2), 13–20. [https://doi.org/10.1016/0165-2427\(95\)05516-9](https://doi.org/10.1016/0165-2427(95)05516-9)
56. Helfand, S. (1988). Neoplasia and immune-mediated thrombocytopenia. *Veterinary Clinics of North America: Small Animal Practice*, 18(1), 255–276. [https://doi.org/10.1016/S0195-5616\(88\)50020-7](https://doi.org/10.1016/S0195-5616(88)50020-7)
57. Helfand, S. C., Couto, C. G., & Madewell, B. R. (1985). Immune-mediated thrombocytopenia associated with solid tumors in dogs. *The Journal of the American Animal Hospital Association (USA)*, 21(6), 787–794.
58. Huang, A. A., Moore, G. E., & Scott-Moncrieff, J. C. (2012). Idiopathic Immune-Mediated Thrombocytopenia and Recent Vaccination in Dogs. *Journal of Veterinary Internal Medicine*, 26(1), 142–148. <https://doi.org/10.1111/j.1939-1676.2011.00850.x>
59. Inokuma, H., Okuda, M., Yoshizaki, Y., Hiraoka, H., Miyama, T., Itamoto, K., Une, S., Nakaichi, M., & Taura, Y. (2005). Clinical observations of *Babesia gibsoni* infection with low parasitaemia confirmed by PCR in dogs. *Veterinary Record*, 156(4), 116–118. <https://doi.org/10.1136/vr.156.4.116>
60. Jackson, M. L., & Kruth, S. A. (1985). Immune-mediated Hemolytic Anemia and Thrombocytopenia in the Dog: A retrospective study of 55 cases diagnosed from 1969 through 1983 at the Western College of Veterinary Medicine. *Canadian Veterinary Journal*, 26(8), 245–250.
61. Jayarajan, A., Pillal, U. N., Ben, A. E., & Alex, P. C. (2011). Evans' syndrome in a German Shepherd Dog. *Indian Veterinary Journal*, 88(10), 123–124.

62. Jeffery, U. (2017). Urban environment: A risk factor for canine immune-mediated disease?: Urban environment and immune-mediated disease. *Journal of Small Animal Practice*, 58(11), 639–644. <https://doi.org/10.1111/jsap.12724>
63. Kang, M.-H., Heo, R.-Y., & Park, H.-M. (2016). Evaluation of D-Dimer Concentrations in Clinically Ill Dogs with High Risk of Thromboembolic Disease. *Pakistan Veterinary Journal*, 36(2), 219–223.
64. Kawarai, S., Hisasue, M., Matsuura, S., Ito, T., Inoue, Y., Neo, S., Fujii, Y., Madarame, H., Shirota, K., & Tsuchiya, R. (2015). Canine Pemphigus Foliaceus with Concurrent Immune-Mediated Thrombocytopenia. *Journal of the American Animal Hospital Association*, 51(1), 56–63. <https://doi.org/10.5326/JAAHA-MS-6044>
65. Keller, E. T. (1992). Immune-mediated disease as a risk factor for canine lymphoma. *Cancer*, 70(9), 2334–2337. [https://doi.org/10.1002/1097-0142\(19921101\)70:9<2334::AID-CNCR2820700920>3.0.CO;2-7](https://doi.org/10.1002/1097-0142(19921101)70:9<2334::AID-CNCR2820700920>3.0.CO;2-7)
66. Kim, S. M., Kim, G. N., Jeong, S. W., & Kim, J. H. (2020). Multiple splenic infarctions in a dog with immune-mediated hemolytic anemia: Therapeutic implications. *Iranian Journal of Veterinary Research*, 21(1), 65–69.
67. Klag, A. R., Giger, U., & Shofer, F. S. (1993). Idiopathic immune-mediated hemolytic anemia in dogs: 42 cases (1986-1990). *Journal of the American Veterinary Medical Association*, 202(5), 783–788.
68. Kohn, B., Bal, G., Chirek, A., Rehbein, S., & Salama, A. (2016). Treatment of 5 dogs with immune-mediated thrombocytopenia using Romiplostim. *BMC Veterinary Research*, 12(1), 96. <https://doi.org/10.1186/s12917-016-0718-4>
69. Kohn, B., Engelbrecht, R., Leibold, W., & Giger, U. (2000). Clinical findings, diagnostics and treatment results in primary and secondary immune-mediated thrombocytopenia in the dog [Klinische Befunde, Diagnostik und Behandlungserfolge bei der primären und sekundären immunbedingten Thrombozytopenie beim Hund]. *Kleintierpraxis*, 45(12), 893–907.
70. Kohn, B., Galke, D., Beelitz, P., & Pfister, K. (2008). Clinical Features of Canine Granulocytic Anaplasmosis in 18 Naturally Infected Dogs. *Journal of Veterinary Internal Medicine*, 22(6), 1289–1295. <https://doi.org/10.1111/j.1939-1676.2008.0180.x>
71. Kohn, B., Linden, T., & Leibold, W. (2006). Platelet-bound antibodies detected by a flow cytometric assay in cats with thrombocytopenia. *Journal of Feline Medicine and Surgery*, 8(4), 254–260. <https://doi.org/10.1016/j.jfms.2006.01.006>
72. Kopecny, L., Palm, C. A., Naylor, S., Kirby, J., & Cowgill, L. D. (2020). Application of therapeutic plasma exchange in dogs with immune-mediated thrombocytopenia. *Journal of Veterinary Internal Medicine*, 34(4), 1576–1581. <https://doi.org/10.1111/jvim.15836>
73. Kristensen, A. T., Weiss, D. J., Klausner, J. S., Laber, J., & Christie, D. J. (1994a). Detection of Antiplatelet Antibody With a Platelet Immunofluorescence Assay. *Journal of Veterinary Internal Medicine*, 8(1), 36–39. <https://doi.org/10.1111/j.1939-1676.1994.tb03193.x>
74. Kristensen, A. T., Weiss, D. J., Klausner, J. S., Laber, J., & Christie, D. J. (1994b). Comparison of microscopic and flow cytometric detection of platelet antibody in dogs suspected of having immune-mediated thrombocytopenia. *American Journal of Veterinary Research*, 55(8), 1111–1114.
75. Lachowicz, J. L., Post, G. S., Moroff, S. D., & Mooney, S. C. (2004). Acquired amegakaryocytic thrombocytopenia—Four cases and a literature review. *Journal of Small Animal Practice*, 45(10), 507–514. <https://doi.org/10.1111/j.1748-5827.2004.tb00197.x>
76. Larkin, H. A., Collins, J. D., & Lambert, N. H. (1972). A fatal case of idiopathic thrombocytopenic purpura in a dog. *Irish Veterinary Journal*, 26(2), 25–28.
77. Laurenson, M. P., Hopper, K., Herrera, M. A., & Johnson, E. G. (2010). Concurrent Diseases and Conditions in Dogs with Splenic Vein Thrombosis: Splenic Vein Thrombosis in Dogs. *Journal of Veterinary Internal Medicine*, 24(6), 1298–1304. <https://doi.org/10.1111/j.1939-1676.2010.0593.x>

78. Lavergne, S. N., & Trepanier, L. A. (2007). Anti-platelet antibodies in a natural animal model of sulphonamide-associated thrombocytopaenia. *Platelets*, 18(8), 595–604. <https://doi.org/10.1080/09537100701392913>
79. Lewis, D. C., McVey, D. S., Shuman, W. S., & Muller, W. B. (1995). Development and characterization of a flow cytometric assay for detection of platelet-bound immunoglobulin G in dogs. *American Journal of Veterinary Research*, 56(12), 1555–1558.
80. Lewis, R. M., Schwartz, R., & Henry, W. B. (1965). Canine systemic lupus erythematosus. *Blood*, 25(2), 143–160. <https://doi.org/10.1182/blood.V25.2.143.143>
81. Lo Piccolo, F., Busch, K., Palić, J., Geisen, V., Hartmann, K., & Unterer, S. (2019). Toxoplasma gondii-associated cholecystitis in a cat receiving immunosuppressive treatment. *Tierärztliche Praxis Ausgabe K: Kleintiere / Heimtiere*, 47, 453–457. <https://doi.org/10.1055/a-1020-3775>
82. Magne, M. L. (1996). Selective IgA deficiency in German Shepherd dogs. *Journal of Veterinary Allergy and Clinical Immunology*, 4(1), 23–24.
83. Mandell, C. P., Jain, N. C., & Farver, T. B. (1989). The significance of normoblastemia and leukoerythroblastic reaction in the dog. *Journal of the American Animal Hospital Association*, 25(6), 665–672.
84. Máthé, Á., Vörös, K., Papp, L., & Reiczigel, J. (2006). Clinical manifestations of canine babesiosis in Hungary (63 cases). *Acta Veterinaria Hungarica*, 54(3), 367–385. <https://doi.org/10.1556/avet.54.2006.3.7>
85. Mazepa, A. W., Kidd, L. B., Young, K. M., & Trepanier, L. A. (2010). Clinical Presentation of 26 Anaplasma phagocytophilum-Seropositive Dogs Residing in an Endemic Area. *Journal of the American Animal Hospital Association*, 46(6), 405–412. <https://doi.org/10.5326/0460405>
86. McAnulty, J. F., & Rudd, R. G. (1985). Thrombocytopenia associated with vaccination of a dog with a modified-live paramyxovirus vaccine. *Journal of the American Veterinary Medical Association*, 186(11), 1217–1219.
87. McVey, D. S., & Shuman, W. S. (1989). Detection of antiplatelet immunoglobulin in thrombocytopenic dogs. *Veterinary Immunology and Immunopathology*, 22(2), 101–111. [https://doi.org/10.1016/0165-2427\(89\)90053-6](https://doi.org/10.1016/0165-2427(89)90053-6)
88. Mellor, P. J., Roulois, A. J. A., Day, M. J., Blacklaws, B. A., Knivett, S. J., & Herrtage, M. E. (2005). Neutrophilic dermatitis and immunemediated haematological disorders in a dog: Suspected adverse reaction to carprofen. *Journal of Small Animal Practice*, 46(5), 237–242. <https://doi.org/10.1111/j.1748-5827.2005.tb00316.x>
89. Mezzano, D., Aranda, E., García, M. E., Pereira, J., Quiroga, T., & Pérez, M. (1992). Total sialic acid in human and canine platelets does not change with the platelet age. *American Journal of Hematology*, 40(1), 5–11. <https://doi.org/10.1002/ajh.2830400103>
90. Michimoto, T., Okamura, T., Suzuki, K., Watari, T., Kano, R., & Hasegawa, A. (2004). Thiazole Orange Positive Platelets in a Dog with Evans' Syndrome. *Journal of Veterinary Medical Science*, 66(10), 1305–1306. <https://doi.org/10.1292/jvms.66.1305>
91. Middleton, S. M. (2005). Immune-mediated thrombocytopenia in a 4-month-old German shepherd dog. *Canadian Veterinary Journal*, 46, 443–445.
92. Moraes, L. F., Takahira, R. K., Golim, M. de A., & Baggio, M. S. (2016). Avaliação das alterações hemostáticas e do risco tromboembólico em cães com AHIM. *Pesquisa Veterinária Brasileira*, 36(5), 405–411. <https://doi.org/10.1590/S0100-736X2016000500009>
93. Morley, P., Mathes, M., Guth, A., & Dow, S. (2008). Anti-Erythrocyte Antibodies and Disease Associations in Anemic and Nonanemic Dogs. *Journal of Veterinary Internal Medicine*, 22(4), 886–892. <https://doi.org/10.1111/j.1939-1676.2008.0112.x>

94. Mylonakis, M. E., Saridomichelakis, M. N., Lazaridis, V., Leontides, L. S., Kostoulas, P., & Koutinas, A. F. (2008). A retrospective study of 61 cases of spontaneous canine epistaxis (1998 to 2001). *Journal of Small Animal Practice*, 49(4), 191–196. <https://doi.org/10.1111/j.1748-5827.2007.00441.x>
95. Nair, A. D. S., Cheng, C., Ganta, C. K., Sanderson, M. W., Alleman, A. R., Munderloh, U. G., & Ganta, R. R. (2016). Comparative Experimental Infection Study in Dogs with *Ehrlichia canis*, *E. chaffeensis*, *Anaplasma platys* and *A. phagocytophilum*. *PLOS ONE*, 11(2), e0148239. <https://doi.org/10.1371/journal.pone.0148239>
96. Nakamura, R. K., Fenty, R. K., & Bianco, D. (2013). Presumptive immune-mediated thrombocytopenia secondary to massive Africanized bee envenomation in a dog: Africanized bee envenomation in a dog. *Journal of Veterinary Emergency and Critical Care*, 23(6), 652–656. <https://doi.org/10.1111/vec.12120>
97. Nassiri, S. M., Chegeni, S., Rezaei, M., Mohammadi, E., & Izadi, S. (2010). Polycythemia vera-related MDS in a dog. *Comparative Clinical Pathology*, 19(6), 627–630. <https://doi.org/10.1007/s00580-010-1074-6>
98. Neelawala, D., Dissanayake, D. R. A., Prasada, D. V. P., & Silva, I. D. (2021). Analysis of risk factors associated with recurrence of canine babesiosis caused by *Babesia gibsoni*. *Comparative Immunology, Microbiology and Infectious Diseases*, 74, 101572. <https://doi.org/10.1016/j.cimid.2020.101572>
99. Ng, Z. Y., Stokes, J. E., Alvarez, L., & Bartges, J. W. (2016). Cryopreserved platelet concentrate transfusions in 43 dogs: A retrospective study (2007-2013): Cryopreserved platelets concentrate in dogs. *Journal of Veterinary Emergency and Critical Care*, 26(5), 720–728. <https://doi.org/10.1111/vec.12503>
100. Øines, Ø., Storli, K., & Brun-Hansen, H. (2010). First case of babesiosis caused by *Babesia canis canis* in a dog from Norway. *Veterinary Parasitology*, 171(3–4), 350–353. <https://doi.org/10.1016/j.vetpar.2010.03.024>
101. O’Neill, E. J., Acke, E., Tobin, E., & McCarthy, G. (2010). Immune-mediated thrombocytopenia associated with *angiostrongylus vasorum* infection in a Jack Russell terrier. *Irish Veterinary Journal*, 63(7), 434. <https://doi.org/10.1186/2046-0481-63-7-434>
102. Orcutt, E. S., Lee, J. A., & Bianco, D. (2010). Immune-mediated hemolytic anemia and severe thrombocytopenia in dogs: 12 cases (2001-2008): Immune-mediated hemolytic anemia and thrombocytopenia in dogs. *Journal of Veterinary Emergency and Critical Care*, 20(3), 338–345. <https://doi.org/10.1111/j.1476-4431.2010.00540.x>
103. Paim, C. B., Paim, F. C., Da Silva, A. S., França, R. T., Costa, M. M., Leal, C. A. M., Soares, J. F., Labruna, M. B., Schetinger, M. R. C., Mazzanti, A., Mazzanti, C. M., Monteiro, S. G., & Lopes, S. T. A. (2012). Thrombocytopenia and platelet activity in dogs experimentally infected with *Rangelia vitalii*. *Veterinary Parasitology*, 185(2–4), 131–137. <https://doi.org/10.1016/j.vetpar.2011.09.039>
104. Penhale, W., Day, M., Lines, A., & McKenna, R. (1990). A review of cases submitted to Murdoch University for immunodiagnostic testing: 1978–1989. *Australian Veterinary Journal*, 67(4), 148–149. <https://doi.org/10.1111/j.1751-0813.1990.tb07737.x>
105. Peterson, M. E., Kintzer, P. P., & Hurvitz, A. I. (1988). Methimazole Treatment of 262 Cats With Hyperthyroidism. *Journal of Veterinary Internal Medicine*, 2(3), 150–157. <https://doi.org/10.1111/j.1939-1676.1988.tb02812.x>
106. Piek, C. J., Junius, G., Dekker, A., Schrauwen, E., Slappendel, R. J., & Teske, E. (2008). Idiopathic Immune-Mediated Hemolytic Anemia: Treatment Outcome and Prognostic Factors in 149 Dogs. *Journal of Veterinary Internal Medicine*, 22(2), 366–373. <https://doi.org/10.1111/j.1939-1676.2008.0060.x>
107. Pierce, K. R., Marrs, G. E., & Hightower, D. (1977). Acute canine ehrlichiosis: Platelet survival and factor 3 assay. *American Journal of Veterinary Research*, 38(11), 1821–1825.

108. Płoneczka-Janeczko, K., & Rypuła, K. (2011). Application of a flow cytometry in differentiation of antibodies accompanying platelets in *Ehrlichia canis* and *Borrelia burgdorferi* infections in dogs. *Central European Journal of Immunology*, 36(3), 174–179.
109. Prihirunkit, K., Choothesa, A., Salakij, C., & Pisetpaisan, A. (2010). Immune-mediated hemolytic anemia in a dog with acute monoblastic leukemia. *Comparative Clinical Pathology*, 19(6), 631–634. <https://doi.org/10.1007/s00580-010-1092-4>
110. Quorollo, B. A., Buch, J., Chandrashekar, R., Beall, M. J., Breitschwerdt, E. B., Yancey, C. B., Caudill, A. H., & Comyn, A. (2019). Clinicopathological findings in 41 dogs (2008-2018) naturally infected with *Ehrlichia ewingii*. *Journal of Veterinary Internal Medicine*, 33(2), 618–629. <https://doi.org/10.1111/jvim.15354>
111. Raguvaran, R., Mondal, R. S. K., & Mondal, D. B. (2019). Management of Immune Mediated Hemolytic Anemia (IMHA) Secondary to Paracetamol Toxicity in a Dog. *Intas Polivet*, 20(1), 180–181.
112. Rakshit, S., Clark, D., Roy, K., & Datta, I. C. (2020). Immune-mediated hemolytic anemia in a cat: Diagnosis and treatment. *Haryana Veterinarian*, 59(2), 276–278.
113. Ralph, A. G., Saunders, A. B., Hariu, C. D., & Nabity, M. (2011). Spontaneous echocardiographic contrast in three dogs: Spontaneous echocardiographic contrast in dogs. *Journal of Veterinary Emergency and Critical Care*, 21(2), 158–165. <https://doi.org/10.1111/j.1476-4431.2011.00624.x>
114. Reimer, M. E., Troy, G. C., & Warnick, L. D. (1999). Immune-mediated hemolytic anemia: 70 cases (1988-1996). *Journal of the American Animal Hospital Association*, 35(5), 384–391. <https://doi.org/10.5326/15473317-35-5-384>
115. Ridyard, A. E., Shaw, D. J., & Milne, E. M. (2010). Evaluation of platelet activation in canine immune-mediated haemolytic anaemia. *Journal of Small Animal Practice*, 51(6), 296–304. <https://doi.org/10.1111/j.1748-5827.2010.00935.x>
116. Saberi, M., Akhtardanesh, B., & Mohebbi, E. (2012). Treatment of Evan's syndrome by leflunomide and desmopressin in a mixed-breed dog. *Comparative Clinical Pathology*, 21(4), 485–488. <https://doi.org/10.1007/s00580-012-1510-x>
117. Sakai, H., Tamura, S., & Sakai, K. (2014). Amegakaryocytic thrombocytopenia in a dog. *Journal of Animal Clinical Medicine*, 23(1), 34–37.
118. Sangeetha, S. G., Ajith, Y., Dixit, S. K., & Reena, K. K. (2017). PCR Based Diagnosis and Clinical Management of Ehrlichiosis in a Dog. *Intas Polivet*, 18(1), 187–191.
119. Sato, M., Veir, J. K., Shropshire, S. B., & Lappin, M. R. (2020). *Ehrlichia canis* in dogs experimentally infected, treated, and then immune suppressed during the acute or subclinical phases. *Journal of Veterinary Internal Medicine*, 34(3), 1214–1221. <https://doi.org/10.1111/jvim.15750>
120. Schoeman, T., Lobetti, R. G., Jacobson, L. S., & Penzhorn, B. L. (2001). Feline babesiosis: Signalment, clinical pathology and concurrent infections. *Journal of the South African Veterinary Association*, 72(1), 4–11. <https://doi.org/10.4102/jsava.v72i1.601>
121. Schwartz, D., Sharkey, L., Armstrong, P. J., Knudson, C., & Kelley, J. (2014). Platelet Volume and Plateletcrit in Dogs with Presumed Primary Immune-Mediated Thrombocytopenia. *Journal of Veterinary Internal Medicine*, 28(5), 1575–1579. <https://doi.org/10.1111/jvim.12405>
122. Scott, T. N., Bailin, H. G., Jutkowitz, L. A., Scott, M. A., & Lucidi, C. A. (2021). Bone marrow, blood, and clinical findings in dogs treated with phenobarbital. *Veterinary Clinical Pathology*, 50(1), 122–131. <https://doi.org/10.1111/vcp.13013>
123. Scott-Moncrieff, J., Treadwell, N., McCullough, S., & Brooks, M. (2001). Hemostatic abnormalities in dogs with primary immune-mediated hemolytic anemia. *Journal of the American Animal Hospital Association*, 37(3), 220–227. <https://doi.org/10.5326/15473317-37-3-220>
124. Şentürk, S., & Temizel, M. (2001). Bir Köpekte İmmun İlişkili Hemolitik Anemi ve Trombositopenin Vincristine ile Tedavisi. *Veteriner Fakültesi Dergisi, Uludağ Üniversitesi*, 20(3), 85–91.



125. Şentürk, S., Temizel, M., Cihan, H., & Aytuğ, N. (2010). Comparison of the effects of Prednisolon, Danazol and Testosteron propionat therapy in dogs with immune mediated hemolytic anemia and thrombocytopenia. *Veteriner Fakültesi Dergisi, Uludağ Üniversitesi*, 29(2), 57–63.
126. Shropshire, S., Dow, S., & Lappin, M. (2018). Validation of a clinically applicable flow cytometric assay for the detection of immunoglobulin associated platelets in dogs. *Veterinary Immunology and Immunopathology*, 202, 109–114. <https://doi.org/10.1016/j.vetimm.2018.07.003>
127. Shropshire, S., Dow, S., & Lappin, M. (2020). Detection and dynamics of anti-platelet antibodies in thrombocytopenic dogs with and without idiopathic immune thrombocytopenia. *Journal of Veterinary Internal Medicine*, 34(2), 700–709. <https://doi.org/10.1111/jvim.15737>
128. Shropshire, S., Olver, C., & Lappin, M. (2018). Characteristics of hemostasis during experimental *Ehrlichia canis* infection. *Journal of Veterinary Internal Medicine*, 32(4), 1334–1342. <https://doi.org/10.1111/jvim.15130>
129. Singh, T. P., & Pangawkar, G. R. (1998). Haemostatic disorders in dogs infected with transmissible venereal tumour. *Indian Veterinary Journal*, 75(10), 879–881.
130. Smith, C., & Tappin, S. (2012). Evans Syndrome (immune-mediated haemolytic anaemia with immune-mediated thrombocytopenia) in a three-year-old male neutered Springer Spaniel. *Companion Animal*, 17(4), 31–35. <https://doi.org/10.1111/j.2044-3862.2012.00178.x>
131. Snead, E., Vargo, C., & Myers, S. (2011). Glucocorticoid-dependent hypoadrenocorticism with thrombocytopenia and neutropenia mimicking sepsis in a Labrador retriever dog. *Canadian Veterinary Journal*, 52, 1129–1134.
132. Sugar, N., Paitan, Y., Merhavi, N., Aroch, I., & Kelmer, E. (2018). Erysipelothrix rhusiopathiea infectious endocarditis and putative secondary immune mediated hemolytic anemia and thrombocytopenia in a dog, and a literature review. *Israel Journal of Veterinary Medicine*, 73(4), 30–38.
133. Sullivan, P. S., Arrington, K., West, R., & McDonald, T. P. (1992). Thrombocytopenia associated with administration of trimethoprim/sulfadiazine in a dog. *Journal of the American Veterinary Medical Association*, 201(11), 1741–1744.
134. Sundburg, C. R., Belanger, J. M., Bannasch, D. L., Famula, T. R., & Oberbauer, A. M. (2016). Gonadectomy effects on the risk of immune disorders in the dog: A retrospective study. *BMC Veterinary Research*, 12(1), 278. <https://doi.org/10.1186/s12917-016-0911-5>
135. Tamí, I., Martínez, J. I., Tamí, M., Redondo, M. C., Finol, H., & Simonovis, N. (1996). Identification of Ehrlichia Species in Blood Smear: *Infectious Diseases in Clinical Practice*, 5(9), 555–557. <https://doi.org/10.1097/00019048-199612000-00011>
136. Tasker, S., Mackin, A. J., & Day, M. J. (1999). Primary immune-mediated thrombocytopenia in a cat. *Journal of Small Animal Practice*, 40(3), 127–131. <https://doi.org/10.1111/j.1748-5827.1999.tb03054.x>
137. Terrazzano, G., Cortese, L., Piantedosi, D., Zappacosta, S., Di Loria, A., Santoro, D., Ruggiero, G., & Ciaramella, P. (2006). Presence of anti-platelet IgM and IgG antibodies in dogs naturally infected by *Leishmania infantum*. *Veterinary Immunology and Immunopathology*, 110(3–4), 331–337. <https://doi.org/10.1016/j.vetimm.2005.11.001>
138. Theilen, G. (1997). Possible relationships between canine hematopoietic neoplasia, other malignancies and immune mediated diseases. *Leukemia (Basingstoke)*, 11(S3), 187–188.
139. Vargo, C. L., Taylor, S. M., & Haines, D. M. (2007). Immune mediated neutropenia and thrombocytopenia in 3 giant schnauzers. 48(11), 1159–1163.
140. Vasilopoulos, R. J., Mackin, A., Lavergne, S. N., & Trepanier, L. A. (2005). Nephrotic syndrome associated with administration of sulfadimethoxine/ ormetoprim in a dobermann. *Journal of Small Animal Practice*, 46(5), 232–236. <https://doi.org/10.1111/j.1748-5827.2005.tb00315.x>

141. Vijayalakshmi, P., Srinivasan, S. R., Vairamuthu, S., Mangalagowri, A., Latha, B. R., & Nambi, A. P. (2014). Clinico pathological features in dogs associated with babesiosis. *Indian Veterinary Journal*, 91(4), 21–24. Scopus.
142. Waner, T., Harrus, S., Weiss, D. J., Bark, H., & Keysary, A. (1995). Demonstration of serum antiplatelet antibodies in experimental acute canine ehrlichiosis. *Veterinary Immunology and Immunopathology*, 48(1–2), 177–182. [https://doi.org/10.1016/0165-2427\(95\)05420-B](https://doi.org/10.1016/0165-2427(95)05420-B)
143. Waner, T., Leykin, I., Shinitsky, M., Sharabani, E., Buch, H., Keysary, A., Bark, H., & Harrus, S. (2000). Detection of platelet-bound antibodies in beagle dogs after artificial infection with *Ehrlichia canis*. *Veterinary Immunology and Immunopathology*, 77, 145–150.
144. Waner, T., & Lurie, S. (1992). Aspirin implicated immune-mediated haemolytic anaemia and thrombocytopenia in a dog—A case report. *Israel Journal of Veterinary Medicine*, 47(3), 112–115. CABDirect.
145. Weingart, C., Thielemann, D., & Kohn, B. (2019). Primary immune-mediated haemolytic anaemia: A retrospective long-term study in 61 dogs. *Australian Veterinary Journal*, 97(12), 483–489. <https://doi.org/10.1111/avj.12875>
146. Weiss, D. J., & Aird, B. (2001). Cytologic Evaluation of Primary and Secondary Myelodysplastic Syndromes in the Dog. *Veterinary Clinical Pathology*, 30(2), 67–75. <https://doi.org/10.1111/j.1939-165X.2001.tb00261.x>
147. Weiss, D. J., & Henson, M. (2007). Pure white cell aplasia in a dog. *Veterinary Clinical Pathology*, 36(4), 373–375. <https://doi.org/10.1111/j.1939-165X.2007.tb00445.x>
148. Weiss, Douglas J. (2004). Selective dysmegakaryopoiesis in thrombocytopenic dogs (1996-2002). *Comparative Clinical Pathology*, 13, 24–28. <https://doi.org/10.1007/s00580-004-0515-5>
149. Wondratschek, C., Weingart, C., & Kohn, B. (2010). Primary Immune-Mediated Thrombocytopenia in Cats. *Journal of the American Animal Hospital Association*, 46(1), 12–19. <https://doi.org/10.5326/0460012>
150. Woods, J. P., Johnstone, I. B., Bienzle, D., Balson, G., & Gartley, C. J. (1995). Concurrent lymphangioma, immune-mediated thrombocytopenia, and von Willebrand's disease in a dog. *Journal of the American Animal Hospital Association*, 31(1), 70–76. <https://doi.org/10.5326/15473317-31-1-70>
151. Zenker, I., Keller, L., Meichner, K., Unterer, S., & Hartmann, K. (2009). Immune mediated destruction of platelets in dogs with heat stroke: A prospective study. *Tierärztliche Praxis Ausgabe K: Kleintiere / Heimtiere*, 37(K), 314–318. <https://doi.org/10.1055/s-0038-1622811>
152. Zygnier, W., Gójska-Zygnier, O., & Szmiedt, K. (2011). Vincristine and cyclophosphamide in the treatment of persistent anemia and thrombocytopenia related to *Babesia canis* infection in dog. *Zycie Weterynaryjne*, 86(5), 374–378.

#### Studies identified via evidence evaluator knowledge

153. Axthelm, M. K., & Krakowka, S. (1987). Canine distemper virus-induced thrombocytopenia. *American Journal of Veterinary Research*, 48(8), 1269–1275.
154. Bloom, J. C., Thiem, P. A., Sellers, T. S., Deldar, A., & Lewis, H. B. (1988). Cephalosporin-induced immune cytopenia in the dog: Demonstration of erythrocyte-, neutrophil-, and platelet-associated IgG following treatment with cefazedone. *American Journal of Hematology*, 28(2), 71–78. <https://doi.org/10.1002/ajh.2830280202>
155. Gabbert, N. H. (1983). Systemic lupus erythematosus in a cat with thrombocytopenia [Chlamydia]. *Veterinary Medicine and Small Animal Clinician*, 1, 77–79.
156. Jordan, H. L., Grindem, C. B., & Breitschwerdt, E. B. (1993). Thrombocytopenia in cats: A retrospective study of 41 cases. *Journal of Veterinary Internal Medicine*, 7(5), 261–265. <https://doi.org/10.1111/j.1939-1676.1993.tb01017.x>

157. Lewis, D. C., Meyers, K. M., Callan, M. B., Bücheler, J., & Giger, U. (1995). Detection of platelet-bound and serum platelet-bindable antibodies for diagnosis of idiopathic thrombocytopenic purpura in dogs. *Journal of the American Veterinary Medical Association*, 206(1), 47–52.
158. Lewis, R. M., Henry, W. B., Thornton, G. W., & Gilmore, C. E. (1963). A syndrome of autoimmune hemolytic anemia and thrombocytopenia in dogs. *Scientific Proceedings of the 100th Annual Meeting of the American Veterinary Medical Association*, 140–163.
159. Peterson, J. L., Couto, C. G., & Wellman, M. L. (1995). Hemostatic disorders in cats: A retrospective study and review of the literature. *Journal of Veterinary Internal Medicine*, 9(5), 298–303. <https://doi.org/10.1111/j.1939-1676.1995.tb01088.x>
160. Putsche, J. C., & Kohn, B. (2008). Primary immune-mediated thrombocytopenia in 30 dogs (1997-2003). *Journal of the American Animal Hospital Association*, 44(5), 250–257. <https://doi.org/10.5326/0440250>
161. Ridgway, J., Jergens, A. E., & Niyo, Y. (2001). Possible causal association of idiopathic inflammatory bowel disease with thrombocytopenia in the dog. *Journal of the American Animal Hospital Association*, 37(1), 65–74. <https://doi.org/10.5326/15473317-37-1-65>
162. Trepanier, L. A., Danhof, R., Toll, J., & Deborah Watrous. (2003). Clinical Findings in 40 Dogs with Hypersensitivity Associated with Administration of Potentiated Sulfonamides. *Journal of Veterinary Internal Medicine*, 17(5), 647–652. <https://doi.org/10.1111/j.1939-1676.2003.tb02495.x>
163. Wilkerson, M. J., Shuman, W., Swist, S., Harkin, K., Meinkoth, J., & Kocan, A. A. (2001). Platelet size, platelet surface-associated IgG, and reticulated platelets in dogs with immune-mediated thrombocytopenia. *Veterinary Clinical Pathology*, 30(3), 141–149. <https://doi.org/10.1111/j.1939-165x.2001.tb00423.x>
164. Wilkins, R. J., Hurvitz, A. I., & Dodds-Laffin, W. J. (1973). Immunologically mediated thrombocytopenia in the dog. *Journal of the American Veterinary Medical Association*, 163(3), 277–282.

#### [Studies identified via Scopus forward citation searching](#)

165. Tuttle, A. D., Birkenheuer, A. J., Juopperi, T., Levy, M. G., & Breitschwerdt, E. B. (2003). Concurrent bartonellosis and babesiosis in a dog with persistent thrombocytopenia. *Journal of the American Veterinary Medical Association*, 223(9), 1306–1310. <https://doi.org/10.2460/javma.2003.223.1306>
