# Supplementary material for: ACVIM consensus statement on the diagnosis of immune thrombocytopenia in dogs and cats
Source: PubMed Central journal article supplement — J Vet Intern Med. 2024 May 16;38(4):1958–81. doi: 10.1111/jvim.16996 (PMC11256148; doi:10.1111/jvim.16996), 2024-05-16
Supplement: JVIM-38-1958-s016.pdf [file JVIM-38-1958-s016.pdf]

## Supporting Information 2: Bibliography of studies for diagnosis

### Studies identified via systematic search of bibliographic databases.

1. Akiyoshi, M., Hisasue, M., Neo, S., & Akiyoshi, M. (2021). Presumptive hemophagocytic syndrome associated with immune-mediated anemia in two Miniature Dachshunds. *Journal of Veterinary Medical Science*, 83(4), 689–694. <https://doi.org/10.1292/jvms.20-0566>
2. Allen, E. C., Tarigo, J. L., LeVine, D. N., Barber, J. P., & Brainard, B. M. (2021). Platelet number and function in response to a single intravenous dose of vincristine. *Journal of Veterinary Internal Medicine*, 35(4), 1754–1762. <https://doi.org/10.1111/jvim.16169>
3. Antognoni, M. T., Veronesi, F., & Morganti, G. (2014). Natural infection of *Anaplasma platys* in dogs from Umbria region (Central Italy). *Veterinaria Italiana*, 50, 59–56. <https://doi.org/10.12834/VetIt.82.258.2>
4. Atkinson, M. (2011). IMT in spaniel after vaccination. *Vet Times*, 41(7), 1–13.
5. Aubert, I., Carrier, M., Desnoyers, M., & Breton, L. (1997). Un cas d'hyp'héma bilatéral secondaire à une thrombocytopénie à médiation immunitaire chez un chien. *Médecin Vétérinaire Du Québec*, 27(3), 103–108.
6. Aubert, I., & Daminet, S. (1996). Diagnostic de la thrombocytopénie à médiation immunitaire: Revue de littérature et étude rétrospective. *Médecin Vétérinaire Du Québec*, 26(4), 152–153.
7. Bach, J. F., Mahony, O. M., Tidwell, A. S., & Rush, J. E. (2007). Brain abscess and bacterial endocarditis in a Kerry Blue Terrier with a history of immune-mediated thrombocytopenia. *Journal of Veterinary Emergency and Critical Care*, 17(4), 409–415. <https://doi.org/10.1111/j.1476-4431.2007.00245.x>
8. Bachman, D. E., Forman, M. A., Hostutler, R. A., Corn, S., Lin, J., & Kociba, G. J. (2015). Prospective diagnostic accuracy evaluation and clinical utilization of a modified assay for platelet-associated immunoglobulin in thrombocytopenic and nonthrombocytopenic dogs. *Veterinary Clinical Pathology*, 44(3), 355–368. <https://doi.org/10.1111/vcp.12281>
9. Back, F. P., Lacerda, L. de A., & Ventura, F. V. C. (2013). Human intravenous immunoglobulin for the treatment of immune-mediated thrombocytopenia in dog—Case report. *Acta Veterinaria Brasilica*, 7(S1), 535–536.
10. Bailiff, N. L., & Norris, C. R. (2002). Clinical Signs, Clinicopathological Findings, Etiology, and Outcome Associated With Hemoptysis in Dogs: 36 Cases (1990–1999). *Journal of the American Animal Hospital Association*, 38(2), 125–133. <https://doi.org/10.5326/0380125>
11. Balog, K., Huang, A. A., Sum, S. O., Moore, G. E., Thompson, C., & Scott-Moncrieff, J. C. (2013). A Prospective Randomized Clinical Trial of Vincristine versus Human Intravenous Immunoglobulin for Acute Adjunctive Management of Presumptive Primary Immune-Mediated Thrombocytopenia in Dogs. *Journal of Veterinary Internal Medicine*, 27(3), 536–541. <https://doi.org/10.1111/jvim.12066>
12. Best, M., & Fry, D. (2014). Primary immune-mediated thrombocytopenia and immune-mediated neutropenia suspected in a 21-week-old Maine Coon cat. *Australian Veterinary Journal*, 92(7), 250–253. <https://doi.org/10.1111/avj.12186>

13. Bexfield, N. H., Villiers, E. J., & Herrtage, M. E. (2005). Immune-mediated haemolytic anaemia and thrombocytopenia associated with *Anaplasma phagocytophilum* in a dog. *Journal of Small Animal Practice*, 46(11), 543–548. <https://doi.org/10.1111/j.1748-5827.2005.tb00284.x>
14. Bianco, D., Armstrong, P. J., & Washabau, R. J. (2007). Treatment of Severe Immune-Mediated Thrombocytopenia with Human IV Immunoglobulin in 5 Dogs. *Journal of Veterinary Internal Medicine*, 21(4), 694–699. <https://doi.org/10.1111/j.1939-1676.2007.tb03010.x>
15. Bianco, D., Armstrong, P. J., & Washabau, R. J. (2008). Presumed primary immune-mediated thrombocytopenia in four cats. *Journal of Feline Medicine and Surgery*, 10(5), 495–500. <https://doi.org/10.1016/j.jfms.2008.01.003>
16. Bianco, D., Armstrong, P. J., & Washabau, R. J. (2009). A Prospective, Randomized, Double-Blinded, Placebo-Controlled Study of Human Intravenous Immunoglobulin for the Acute Management of Presumptive Primary Immune-Mediated Thrombocytopenia in Dogs. *Journal of Veterinary Internal Medicine*, 23(5), 1071–1078. <https://doi.org/10.1111/j.1939-1676.2009.0358.x>
17. Bianco, D., & Hardy, R. M. (2009). Treatment of Evans' Syndrome With Human Intravenous Immunoglobulin and Leflunomide in a Diabetic Dog. *Journal of the American Animal Hospital Association*, 45(3), 147–150. <https://doi.org/10.5326/0450147>
18. Birkenheuer, A. J., Correa, M. T., Levy, M. G., & Breitschwerdt, E. B. (2005). Geographic distribution of babesiosis among dogs in the United States and association with dog bites: 150 cases (2000–2003). *Journal of the American Veterinary Medical Association*, 227(6), 942–947. <https://doi.org/10.2460/javma.2005.227.942>
19. Bloom, J. C., Blackmer, S. A., Bugelski, P. J., Sowinski, J. M., & Saunders, L. Z. (1985). Gold-induced Immune Thrombocytopenia in the Dog. *Veterinary Pathology*, 22(5), 492–499. <https://doi.org/10.1177/030098588502200509>
20. Bloom, J. C., Meunier, L. D., Thiem, P. A., & Sellers, T. S. (1989). Use of danazol for treatment of corticosteroid-resistant immune-mediated thrombocytopenia in a dog. *Journal of the American Veterinary Medical Association*, 194(1), 76–78.
21. Bodié, K., Gagne, G. D., Sramek, M. K., Desmond, D. J., Abel, S. J., & Fagerland, J. A. (2011). Asymptomatic Macrothrombocytopenia in a Young Pure-Bred Beagle Dog: A Case Report. *Toxicologic Pathology*, 39(6), 980–987. <https://doi.org/10.1177/0192623311416261>
22. Botsch, V., Küchenhoff, H., Hartmann, K., & Hirschberger, J. (2009). Retrospective study of 871 dogs with thrombocytopenia. *Veterinary Record*, 164(21), 647–651. <https://doi.org/10.1136/vr.164.21.647>
23. Bourguignon, C., Béguin, J., & Benchekroun, G. (2017). Immune-mediated thrombocytopenia in a dog. *Point Vétérinaire*, 48(373), 48–54.
24. Breitschwerdt, E. B., Blann, K. R., Stebbins, M. E., Muñana, K. R., Davidson, M. G., Jackson, H. A., & Willard, M. D. (2004). Clinicopathological Abnormalities and Treatment Response in 24 Dogs Seroreactive to Bartonella vinsonii (berkhoffii) Antigens. *Journal of the American Animal Hospital Association*, 40(2), 92–101. <https://doi.org/10.5326/0400092>
25. Bulman-Fleming, J. C., Gibson, T. W., & Kruth, S. A. (2009). Invasive cutaneous angiomatosis and thrombocytopenia in a cat. *Journal of the American Veterinary Medical Association*, 234(3), 381–384. <https://doi.org/10.2460/javma.234.3.381>

26. Busse, L., & Mischke, R. (1998). Megakaryopoiesis in bone marrow of dogs with autoimmune-induced thrombocytopenia and Ehrlichia canis infection. *Tierärztliche Umschau*, 53(12), 703–708.
27. Busta, I., Xie, H., & Kim, M.-S. (2009). The Use of Gui-Pi-Tang in Small Animals with Immune-Mediated Blood Disorders. *Journal of Veterinary Clinics*, 26(2), 181–184.
28. Cain, G. R., Cain, J. L., Turrel, J. M., Theilen, G., & Jain, N. C. (1988). Immune-mediated Hemolytic Anemia and Thrombocytopenia in a Cat after Bone Marrow Transplantation. *Veterinary Pathology*, 25(2), 161–162. <https://doi.org/10.1177/030098588802500209>
29. Cain, G. R., Champlin, R., & Jain, N. (1989). Immune thrombocytopenia in dogs after fetal liver hematopoietic cell transplantation. *Experimental Hematology*, 17(3), 287–291.
30. Callan, M. B., Werner, P., Mason, N. J., Meny, G. M., Raducha, M. G., & Henthorn, P. S. (2013). Polymorphisms in Canine Platelet Glycoproteins Identify Potential Platelet Antigens. *Comparative Medicine*, 63(4), 348–354.
31. Campbell, K. L., George, J. W., & Greene, C. E. (1984). Application of the enzyme-linked immunosorbent assay for the detection of platelet antibodies in dogs. *American Journal of Veterinary Research*, 45(12), 2561–2564.
32. Carr, A. P., Panciera, D. L., & Kidd, L. (2002). Prognostic Factors for Mortality and Thromboembolism in Canine Immune-Mediated Hemolytic Anemia: A Retrospective Study of 72 Dogs. *Journal of Veterinary Internal Medicine*, 16(5), 504–509. <https://doi.org/10.1111/j.1939-1676.2002.tb02378.x>
33. ChangWoo, L., Jeong, N. K., JungSik, L., & JeongWook, S. (1996). Systemic lupus erythematosus in a dog, suspected systemic lupus erythematosus in a dog, and autoimmune thrombocytopenic purpura hemorrhagica in a dog. *Korean Journal of Veterinary Clinical Medicine*, 13(1), 81–86.
34. Chen, Y.-C., Chi, L.-M., Chow, K.-C., Chiou, S.-H., Fan, Y.-H., Ho, S.-P., Hsu, Y.-C., Hwang, Y.-C., Wu, M.-X., Lee, W.-M., Lin, S.-L., Tsang, C.-L., & Mao, F. C. (2016). Association of anticardiolipin, antiphosphatidylserine, anti-β2 glycoprotein I, and antiphosphatidylcholine autoantibodies with canine immune thrombocytopenia. *BMC Veterinary Research*, 12(1), 106. <https://doi.org/10.1186/s12917-016-0727-3>
35. Chethan, G. E., Thakur, N., Madhesh, E., Garkhal, J., Mahendran, K., De, U. K., & Dixit, S. K. (2016). Therapeutic management of Ehrlichia canis induced pancytopenia and hepatopathy in a dog. *Journal of Veterinary Parasitology*, 30(1), 28–31.
36. Chirek, A., Silaghi, C., Pfister, K., & Kohn, B. (2018). Granulocytic anaplasmosis in 63 dogs: Clinical signs, laboratory results, therapy and course of disease: Canine granulocytic anaplasmosis. *Journal of Small Animal Practice*, 59(2), 112–120. <https://doi.org/10.1111/jsap.12787>
37. Clark, H. C., Childress, R. D., & Coleman, N. C. (1980). Idiopathic thrombocytopenic purpura: A review and case report. *Veterinary Medicine Small Animal Clinician*, 75(3), 427–430.
38. Codner, E. C., Roberts, R. E., & Ainsworth, A. G. (1985). Atypical findings in 16 cases of canine ehrlichiosis. *Journal of the American Veterinary Medical Association*, 186(2), 166–169.

39. Çolakoğlu, E. Ç., & Haydardedeoğlu, A. E. (2019). Thrombocyte indices and plateletcrit in dogs with primary immune-mediated hemolytic anemia. *Medycyna Weterynaryjna*, 75(8), 484–486. <https://doi.org/10.21521/mw.6262>
40. Collicutt, N. B., & Garner, B. (2013). Erythrocyte dysplasia in peripheral blood smears from 5 thrombocytopenic dogs treated with vincristine sulfate. *Veterinary Clinical Pathology*, 42(4), 458–464. <https://doi.org/10.1111/vcp.12089>
41. Cooper, S. A., Huang, A. A., Raskin, R. E., Weng, H.-Y., & Scott-Moncrieff, J. C. (2016). Clinical data, clinicopathologic findings and outcome in dogs with amegakaryocytic thrombocytopenia and primary immune-mediated thrombocytopenia: Amegakaryocytic thrombocytopenia. *Journal of Small Animal Practice*, 57(3), 142–147. <https://doi.org/10.1111/jsap.12441>
42. Cortese, L., Pelagalli, A., Piantedosi, D., Cestaro, A., Di Loria, A., Lombardi, P., Avallone, L., & Ciaramella, P. (2009). Effects of therapy on haemostasis in dogs infected with *Leishmania infantum*, *Ehrlichia canis*, or both combined. *Veterinary Record*, 164(14), 433–434. <https://doi.org/10.1136/vr.164.14.433>
43. Cortese, L., Piantedosi, D., Ciaramella, P., Pero, M. E., Sica, M., Ruggiero, G., Terrazzano, G., & Mastellone, V. (2009). Secondary immune-mediated thrombocytopenia in dogs naturally infected by *Leishmania infantum*. *Veterinary Record*, 164(25), 778–782. <https://doi.org/10.1136/vr.164.25.778>
44. Cortese, L., Terrazzano, G., Piantedosi, D., Sica, M., Prisco, M., Ruggiero, G., & Ciaramella, P. (2011). Prevalence of anti-platelet antibodies in dogs naturally co-infected by *Leishmania infantum* and *Ehrlichia canis*. *The Veterinary Journal*, 188(1), 118–121. <https://doi.org/10.1016/j.tvjl.2010.03.015>
45. Cummings, F. O., & Rizzo, S. A. (2017). Treatment of presumptive primary immune-mediated thrombocytopenia with mycophenolate mofetil versus cyclosporine in dogs: Treatment of immune-mediated thrombocytopenia dogs. *Journal of Small Animal Practice*, 58(2), 96–102. <https://doi.org/10.1111/jsap.12621>
46. Cuq, B., Blois, S. L., & Mathews, K. A. (2017). Anti-thymocyte serum as part of an immunosuppressive regimen in treating haematological immune-mediated diseases in dogs: RADTS in canine immune-mediated diseases. *Journal of Small Animal Practice*, 58(6), 348–354. <https://doi.org/10.1111/jsap.12666>
47. Davidow, E. B., Brainard, B., Martin, L. G., Beal, M. W., Bode, A., Ford, M. J., Ramsey, N., Fagella, A., & Jutkowitz, A. (2012). Use of fresh platelet concentrate or lyophilized platelets in thrombocytopenic dogs with clinical signs of hemorrhage: A preliminary trial in 37 dogs: Lyophilized platelets in bleeding thrombocytopenic dogs. *Journal of Veterinary Emergency and Critical Care*, 22(1), 116–125. <https://doi.org/10.1111/j.1476-4431.2011.00710.x>
48. Davis, W. M. (1984). Hapten-induced, immune-mediated thrombocytopenia in a dog. *Journal of the American Veterinary Medical Association*, 184(8), 976–977.
49. Day, M. J. (1996). Serial monitoring of clinical, haematological and immunological parameters in canine autoimmune haemolytic anaemia. *Journal of Small Animal Practice*, 37(11), 523–534. <https://doi.org/10.1111/j.1748-5827.1996.tb02313.x>
50. Day, M. J., & Penhale, W. J. (1992). Immune-mediated disease in the old English sheepdog. *Research in Veterinary Science*, 53(1), 87–92. [https://doi.org/10.1016/0034-5288\(92\)90090-O](https://doi.org/10.1016/0034-5288(92)90090-O)

51. Dircks, B. H., Schuberth, H.-J., & Mischke, R. (2009). Underlying diseases and clinicopathologic variables of thrombocytopenic dogs with and without platelet-bound antibodies detected by use of a flow cytometric assay: 83 cases (2004–2006). *Journal of the American Veterinary Medical Association*, 235(8), 960–966. <https://doi.org/10.2460/javma.235.8.960>
52. Dircks, B., Schuberth, H. J., & Mischke, R. (2011). Klinische und labordiagnostische Parameter bei 21 Hunden mit primärer immunvermittelter Thrombozytopenie. *Tierärztliche Praxis Ausgabe K: Kleintiere / Heimtiere*, 39(K), 17–24. <https://doi.org/10.1055/s-0037-1622569>
53. Dorrestein, E., Peda, A., Thrall, M. A., & Illanes, O. (2019). Fatal pulmonary thromboembolism in a two-year-old dog receiving long-term corticosteroid therapy. *Veterinary Record Case Reports*, 7(2). <https://doi.org/10.1136/vetreccr-2018-000701>
54. Duval, D., & Giger, U. (1996). Vaccine-Associated Immune-Mediated Hemolytic Anemia in the Dog. *Journal of Veterinary Internal Medicine*, 10(5), 290–295. <https://doi.org/10.1111/j.1939-1676.1996.tb02064.x>
55. Ellis, J., Bell, R., Barnes, D. C., & Miller, R. (2018). Prevalence and disease associations in feline thrombocytopenia: A retrospective study of 194 cases: Thrombocytopenia in cats. *Journal of Small Animal Practice*, 59(9), 531–538. <https://doi.org/10.1111/jsap.12814>
56. Enders, A., van der Woerd, A., & Donovan, T. (2017). Endogenous mycotic endophthalmitis in a dog with candiduria and Evans syndrome. *Veterinary Ophthalmology*, 20(1), 84–88. <https://doi.org/10.1111/vop.12373>
57. Engelbrecht, R., Kohn, B., Leibold, W., & Giger, U. (2002). Clinical findings, diagnosis and treatment results in primary and secondary immune-mediated haemolytic anaemia in dogs. *Kleintierpraxis*, 47(5), 265–278.
58. Espadale, E., Buckley, L., Borio, S., McEwan, N., & Schmidt, V. (2018). Successful multimodal treatment of *Paecilomyces lilacinus* infection in a dog. *Veterinary Record Case Reports*, 6(2). <https://doi.org/10.1136/vetreccr-2018-000627>
59. Fathi, E., & Jamshidi, S. (2014). Follow-up, diagnosis, clinical evidence, laboratory evaluation, and treatment of Idiopathic thrombocytopenia using human Intravenous Immunglobulin in a terrier dog. *Iranian Journal of Veterinary Science and Technology*, 6(1), 64–70.
60. Feldman, B. F. (1996). Demographics of canine immune-mediated haemolytic anaemia in the Southeastern United States. *Comparative Haematology International*, 6(1), 42–45. <https://doi.org/10.1007/BF00368101>
61. Feldman, B. F., Handagama, P., & Lubberink, A. A. (1985). Splenectomy as adjunctive therapy for immune-mediated thrombocytopenia and hemolytic anemia in the dog. *Journal of the American Veterinary Medical Association*, 187(6), 617–619.
62. Feldman, B. F., Thomason, K. J., & Jain, N. C. (1988). Immune-mediated thrombocytopenia in a dog. *Veterinary Clinics of North America: Small Animal Practice*, 18(1), 255–276. [https://doi.org/10.1016/S0195-5616\(88\)50020-7](https://doi.org/10.1016/S0195-5616(88)50020-7)
63. França, R. T., Pillat, M. M., da Silva, C. B., Schafer, A. S., Dornelles, G. L., Costa, M. M., Chaves, R. O., de Andrade, C. M., Erhardt, M. M., Antoziazzi, A. Q., Ulrich, H., da Silva, A. S., & Lopes, S. T. dos A. (2018). Surface immunoglobulins of erythrocytes and platelets in dogs

naturally infected by *Rangelia vitalii*. *Microbial Pathogenesis*, 121, 245–251.  
<https://doi.org/10.1016/j.micpath.2018.05.036>

64. Francey, T., Etter, M., & Schweighauser, A. (2021). Evaluation of membrane-based therapeutic plasma exchange as adjunctive treatment for immune-mediated hematologic disorders in dogs. *Journal of Veterinary Internal Medicine*, 35(2), 925–935.  
<https://doi.org/10.1111/jvim.16049>
65. Friedenber, S. G., Buhrman, G., Chdid, L., Olby, N. J., Olivry, T., Guillaumin, J., O’Toole, T., Goggs, R., Kennedy, L. J., Rose, R. B., & Meurs, K. M. (2016). Evaluation of a DLA-79 allele associated with multiple immune-mediated diseases in dogs. *Immunogenetics*, 68(3), 205–217. <https://doi.org/10.1007/s00251-015-0894-6>
66. Garon, C., Scott, M., Selting, K., & Cohn, L. (1999). Idiopathic thrombocytopenic purpura in a cat. *Journal of the American Animal Hospital Association*, 35(6), 464–470.  
<https://doi.org/10.5326/15473317-35-6-464>
67. Gaschen, F. P., Meyer, B. S., & Harvey, J. W. (1992). Amegakaryocytic thrombocytopenia and immune-mediated haemolytic anaemia in a cat. *Comparative Haematology International*, 2(3), 175–178. <https://doi.org/10.1007/BF00426174>
68. Gaunt, S., Beall, M., Stillman, B., Lorentzen, L., Diniz, P., Chandrashekar, R., & Breitschwerdt, E. (2010). Experimental infection and co-infection of dogs with *Anaplasma platys* and *Ehrlichia canis*: Hematologic, serologic and molecular findings. *Parasites & Vectors*, 3(33). <https://doi.org/10.1186/1756-3305-3-33>
69. Giannuzzi, A. P., De Simone, A., Ricciardi, M., & Gernone, F. (2014). Presumptive Ischemic Brain Infarction in a Dog with Evans’ Syndrome. *Case Reports in Veterinary Medicine*, 2014, 1–8. <https://doi.org/10.1155/2014/456524>
70. Goddard, A., Leisewitz, A. L., Kristensen, A. T., & Schoeman, J. P. (2015). Platelet activation and platelet–leukocyte interaction in dogs naturally infected with *Babesia rossi*. *The Veterinary Journal*, 205(3), 387–392. <https://doi.org/10.1016/j.tvjl.2015.05.008>
71. Goggs, R., Boag, A. K., & Chan, D. L. (2008). Concurrent immune-mediated haemolytic anaemia and severe thrombocytopenia in 21 dogs. *Veterinary Record*, 163(11), 323–327. <https://doi.org/10.1136/vr.163.11.323>
72. Goggs, R., Brainard, B. M., LeVine, D. N., Calabro, J., Harrell, K., Mills, T., Stone, R., Davidson, B., Iacovetta, C., Harris, L., Gicking, J., Aslanian, M., Ziegler, A., Fulcher, B., Lightfoot, T., Miller, M., Loftus, J., Walton, R., Blong, A., ... Hale, A. S. (2020). Lyophilized platelets versus cryopreserved platelets for management of bleeding in thrombocytopenic dogs: A multicenter randomized clinical trial. *Journal of Veterinary Internal Medicine*, 34(6), 2384–2397. <https://doi.org/10.1111/jvim.15922>
73. Gonde, S. (2017). Clinico-haemato-biochemical changes in naturally occurring canine babesiosis in Punjab, India. *Malaysian Journal of Veterinary Research*, 8(1), 37–44.
74. Goodman, R. A., & Breitschwerdt, E. B. (2005). Clinicopathologic findings in dogs seroreactive to *Bartonella henselae* antigens. *American Journal of Veterinary Research*, 66(12), 2060–2064. <https://doi.org/10.2460/ajvr.2005.66.2060>
75. Gould, S. M., & McInnes, E. L. (1999). Immune-mediated thrombocytopenia associated with *Angiostrongylus vasorum* infection in a dog. *Journal of Small Animal Practice*, 40(5), 227–232. <https://doi.org/10.1111/j.1748-5827.1999.tb03068.x>

76. Gowing, G. M. (1964). Idiopathic Thrombocytopenic Purpura in the Dog. *Journal of the American Veterinary Medical Association*, 145, 987–990.
77. Greene, C. E., Scoggin, J., Thomas, J. E., & Barsanti, J. A. (1982). Vincristine in the treatment of thrombocytopenia in five dogs. *Journal of the American Veterinary Medical Association*, 180(2), 140–143.
78. Greisen, A. (2008). Leishmania as a cause of Evans syndrome in a Greek street dog. *Dansk Veterinartidsskrift*, 91(5), 8–11.
79. Grindem, C. B., Breitschwerdt, E. B., Corbett, W. T., & Jans, H. E. (1991). Epidemiologic Survey of Thrombocytopenia in Dogs: A Report on 987 Cases. *Veterinary Clinical Pathology*, 20(2), 38–43. <https://doi.org/10.1111/j.1939-165X.1991.tb00566.x>
80. Grindem, C., Breitschwerdt, E., Perkins, P., Cullins, L., Thomas, T., & Hegarty, B. (1999). Platelet-associated immunoglobulin (antiplatelet antibody) in canine Rocky Mountain spotted fever and ehrlichiosis. *Journal of the American Animal Hospital Association*, 35(1), 56–61. <https://doi.org/10.5326/15473317-35-1-56>
81. Grobman, M., Outi, H., Rindt, H., & Reiner, C. (2017). Serum Thymidine Kinase 1, Canine-C-Reactive Protein, Haptoglobin, and Vitamin D Concentrations in Dogs with Immune-Mediated Hemolytic Anemia, Thrombocytopenia, and Polyarthropathy. *Journal of Veterinary Internal Medicine*, 31(5), 1430–1440. <https://doi.org/10.1111/jvim.14787>
82. Guevar, J., Gutierrez-Quintana, R., Leach, J. D. G., & Penderis, J. (2015). What Is Your Neurologic Diagnosis? Suspected immune-mediated thrombocytopenia with secondary spinal cord hemorrhage. *Journal of the American Veterinary Medical Association*, 247(5), 479–482. <https://doi.org/10.2460/javma.247.5.479>
83. Halmay, D., Sótonyi, P., Vajdovich, P., & Gaál, T. (2005). Morphological evaluation of canine platelets on Giemsa- and PAS-stained blood smears. *Acta Veterinaria Hungarica*, 53(3), 337–350. <https://doi.org/10.1556/avet.53.2005.3.7>
84. Hanahachi, A., Kano, R., Watari, T., & Hasegawa, A. (2002). Thiazole orange-positive platelets in a dog with idiopathic thrombocytopenic purpura. *Veterinary Record*, 150(2), 48–49. <https://doi.org/10.1136/vr.150.2.48>
85. Hanzlíček, D., & Bürglová, A. (2012). Non-regenerative immune-mediated haemolytic anaemia in dogs—A description of three cases treated with human immunoglobulin. *Veterinářství*, 62, 343–347.
86. Harrus, S., Day, M. J., Waner, T., & Bark, H. (2001). Presence of immune-complexes, and absence of antinuclear antibodies, in sera of dogs naturally and experimentally infected with *Ehrlichia canis*. *Veterinary Microbiology*, 83(4), 343–349. [https://doi.org/10.1016/S0378-1135\(01\)00431-X](https://doi.org/10.1016/S0378-1135(01)00431-X)
87. Harrus, S., Waner, T., Eldor, A., Zwang, E., & Bark, H. (1996). Platelet dysfunction associated with experimental acute canine ehrlichiosis. *Veterinary Record*, 139(12), 290–293. <https://doi.org/10.1136/vr.139.12.290>
88. Harrus, S., Waner, T., Keysary, A., Aroch, I., Voet, H., & Bark, H. (1998). Investigation of splenic functions in canine monocytic ehrlichiosis. *Veterinary Immunology and Immunopathology*, 62(1), 15–27. [https://doi.org/10.1016/S0165-2427\(97\)00127-X](https://doi.org/10.1016/S0165-2427(97)00127-X)
89. Harrus, S., Waner, T., Weiss, D. J., Keysary, A., & Bark, H. (1996). Kinetics of serum antiplatelet antibodies in experimental acute canine ehrlichiosis. *Veterinary Immunology and Immunopathology*, 51(1–2), 13–20. [https://doi.org/10.1016/0165-2427\(95\)05516-9](https://doi.org/10.1016/0165-2427(95)05516-9)

90. Heinchén, C., & Maurer, M. (1995). Autoimmune thrombocytopenia in a dog. *Praktische Tierarzt*, 76(6), 558–559.
91. Helfand, S. (1988). Neoplasia and immune-mediated thrombocytopenia. *Veterinary Clinics of North America: Small Animal Practice*, 18(1), 255–276. [https://doi.org/10.1016/S0195-5616\(88\)50020-7](https://doi.org/10.1016/S0195-5616(88)50020-7)
92. Helfand, S. C., Couto, C. G., & Madewell, B. R. (1985). Immune-mediated thrombocytopenia associated with solid tumors in dogs. *The Journal of the American Animal Hospital Association (USA)*, 21(6), 787–794.
93. Helfand, S. C., Jain, N. C., & Paul, M. (1984). Vincristine-loaded platelet therapy for idiopathic thrombocytopenia in a dog. *Journal of the American Veterinary Medical Association*, 185(2), 224–226.
94. Herrera, M. A., Burkitt, J. M., Epstein, S. E., Jones, M. E. B., Moore, P. F., & Sykes, J. E. (2009). *Ralstonia pickettii* Septicemia in a Dog with Immune-Mediated Thrombocytopenia. *Journal of Veterinary Internal Medicine*, 23(1), 182–185. <https://doi.org/10.1111/j.1939-1676.2008.0222.x>
95. Hisasue, M., Hukunaga, D., Akaike, K., Ishikawa, T., Saito, M., Tsuchiya, R., & Yamada, T. (2008). A canine case of idiopathic thrombocytopenic purpura successfully treated by intravenous immunoglobulin therapy and splenectomy. *Journal of the Japan Veterinary Medical Association (Japan)*, 61(3), 223–226.
96. Hitoshi, A., Miho, F., & Hiromu, K. (2014). Case of Feline Idiopathic Immune-mediated Thrombocytopenia Effectively Treated with Cyclophosphamide after Splenectomy. *Journal of the Japan Veterinary Medical Association*, 67(4), 269–273.
97. Hsu, K., Snead, E., Davies, J., & Carr, A. (2012). Iatrogenic Hyperadrenocorticism, Calcinosis Cutis, and Myocardial Infarction in a Dog Treated for IMT. *Journal of the American Animal Hospital Association*, 48(3), 209–215. <https://doi.org/10.5326/JAAHA-MS-5740>
98. Huang, A. A., Moore, G. E., & Scott-Moncrieff, J. C. (2012). Idiopathic Immune-Mediated Thrombocytopenia and Recent Vaccination in Dogs. *Journal of Veterinary Internal Medicine*, 26(1), 142–148. <https://doi.org/10.1111/j.1939-1676.2011.00850.x>
99. Inokuma, H., Okuda, M., Yoshizaki, Y., Hiraoka, H., Miyama, T., Itamoto, K., Une, S., Nakaichi, M., & Taura, Y. (2005). Clinical observations of *Babesia gibsoni* infection with low parasitaemia confirmed by PCR in dogs. *Veterinary Record*, 156(4), 116–118. <https://doi.org/10.1136/vr.156.4.116>
100. Jackson, M. L., & Kruth, S. A. (1985). Immune-mediated Hemolytic Anemia and Thrombocytopenia in the Dog: A retrospective study of 55 cases diagnosed from 1969 through 1983 at the Western College of Veterinary Medicine. *Canadian Veterinary Journal*, 26(8), 245–250.
101. Jaffey, J., DeClue, A., Cannon, A., Tocci, L., & Hyland, J. (2019). Presumptive Glucocorticoid-Induced Refractory Hypocalcemia in a Dog with Idiopathic Immune-Mediated Hypoparathyroidism, Thrombocytopenia, and Hemolytic Anemia. *Journal of the American Animal Hospital Association*, 55(1), e551-04. <https://doi.org/10.5326/JAAHA-MS-6705>
102. Jain, N. C., & Kono, C. S. (1980). The Platelet Factor- 3 Test for Detection of Canine Antiplatelet Antibody. *Veterinary Clinical Pathology*, 9(1), 10–14. <https://doi.org/10.1111/j.1939-165X.1980.tb00886.x>



103. Jain, N. C., & Switzer, J. W. (1981). Autoimmune Thrombocytopenia in Dogs and Cats. *Veterinary Clinics of North America: Small Animal Practice*, 11(2), 421–434. [https://doi.org/10.1016/S0195-5616\(81\)50037-4](https://doi.org/10.1016/S0195-5616(81)50037-4)
104. Jans, H. E., Armstrong, P. J., & Price, G. S. (1990). Therapy of Immune Mediated Thrombocytopenia. *Journal of Veterinary Internal Medicine*, 4(1), 4–7. <https://doi.org/10.1111/j.1939-1676.1990.tb00867.x>
105. Jayarajan, A., Pillal, U. N., Ben, A. E., & Alex, P. C. (2011). Evans' syndrome in a German Shepherd Dog. *Indian Veterinary Journal*, 88(10), 123–124.
106. Jeffery, U. (2017). Urban environment: A risk factor for canine immune-mediated disease?: Urban environment and immune-mediated disease. *Journal of Small Animal Practice*, 58(11), 639–644. <https://doi.org/10.1111/jsap.12724>
107. Joshi, B. C., & Jain, N. C. (1976). Detection of antiplatelet antibody in serum and on megakaryocytes of dogs with autoimmune thrombocytopenia. *American Journal of Veterinary Research*, 37(6), 681–685.
108. Joshi, B. C., & Jain, N. C. (1977). Experimental immunologic thrombocytopenia in dogs: A study of thrombocytopenia and megakaryocytopoiesis. *Research in Veterinary Science*, 22(1), 11–17.
109. Joshi, B. C., Raplee, R. G., Powell, A. L., & Hancock, F. (1979). Autoimmune thrombocytopenia in a cat. *Journal*, 15(5), 585–588.
110. Kang, M.-H., Heo, R.-Y., & Park, H.-M. (2016). Evaluation of D-Dimer Concentrations in Clinically Ill Dogs with High Risk of Thromboembolic Disease. *Pakistan Veterinary Journal*, 36(2), 219–223.
111. Kawarai, S., Hisasue, M., Matsuura, S., Ito, T., Inoue, Y., Neo, S., Fujii, Y., Madarame, H., Shirota, K., & Tsuchiya, R. (2015). Canine Pemphigus Foliaceus with Concurrent Immune-Mediated Thrombocytopenia. *Journal of the American Animal Hospital Association*, 51(1), 56–63. <https://doi.org/10.5326/JAAHA-MS-6044>
112. Keller, E. T. (1992). Immune-mediated disease as a risk factor for canine lymphoma. *Cancer*, 70(9), 2334–2337. [https://doi.org/10.1002/1097-0142\(19921101\)70:9<2334::AID-CNCR2820700920>3.0.CO;2-7](https://doi.org/10.1002/1097-0142(19921101)70:9<2334::AID-CNCR2820700920>3.0.CO;2-7)
113. Kim, S. M., Kim, G. N., Jeong, S. W., & Kim, J. H. (2020). Multiple splenic infarctions in a dog with immune-mediated hemolytic anemia: Therapeutic implications. *Iranian Journal of Veterinary Research*, 21(1), 65–69.
114. Kim, S.-L., Cho, C.-S., Kim, M.-J., Kang, T.-Y., Lee, J.-M., Park, H. J., Cheong, tae, Lee, K., & Yun, Y. (2007). A case of idiopathic thrombocytopenia in a Yorkshire terrier dog. *Korean J. of Veterinary Research*, 47(4), 475–478.
115. Klag, A. R., Giger, U., & Shofer, F. S. (1993). Idiopathic immune-mediated hemolytic anemia in dogs: 42 cases (1986-1990). *Journal of the American Veterinary Medical Association*, 202(5), 783–788.
116. Kohn, B., Bal, G., Chirek, A., Rehbein, S., & Salama, A. (2016a). Erratum to: Treatment of 5 dogs with immune-mediated thrombocytopenia using romiplostim. *BMC Veterinary Research*, 12(1), 290. <https://doi.org/10.1186/s12917-016-0787-4>
117. Kohn, B., Bal, G., Chirek, A., Rehbein, S., & Salama, A. (2016b). Treatment of 5 dogs with immune-mediated thrombocytopenia using Romiplostim. *BMC Veterinary Research*, 12(1), 96. <https://doi.org/10.1186/s12917-016-0718-4>

118. Kohn, B., Engelbrecht, R., Leibold, W., & Giger, U. (2000). Clinical findings, diagnostics and treatment results in primary and secondary immune-mediated thrombocytopenia in the dog [Klinische Befunde, Diagnostik und Behandlungserfolge bei der primären und sekundären immunbedingten Thrombozytopenie beim Hund]. *Kleintierpraxis*, *45*(12), 893–907.
119. Kohn, B., Galke, D., Beelitz, P., & Pfister, K. (2008). Clinical Features of Canine Granulocytic Anaplasmosis in 18 Naturally Infected Dogs. *Journal of Veterinary Internal Medicine*, *22*(6), 1289–1295. <https://doi.org/10.1111/j.1939-1676.2008.0180.x>
120. Kohn, B., Linden, T., & Leibold, W. (2006). Platelet-bound antibodies detected by a flow cytometric assay in cats with thrombocytopenia. *Journal of Feline Medicine and Surgery*, *8*(4), 254–260. <https://doi.org/10.1016/j.jfms.2006.01.006>
121. Kopečný, L., Palm, C. A., Naylor, S., Kirby, J., & Cowgill, L. D. (2020). Application of therapeutic plasma exchange in dogs with immune-mediated thrombocytopenia. *Journal of Veterinary Internal Medicine*, *34*(4), 1576–1581. <https://doi.org/10.1111/jvim.15836>
122. Kristensen, A. T., Weiss, D. J., & Klausner, J. S. (1994). Platelet Dysfunction Associated With Immune-Mediated Thrombocytopenia in Dogs. *Journal of Veterinary Internal Medicine*, *8*(5), 323–327. <https://doi.org/10.1111/j.1939-1676.1994.tb03244.x>
123. Kristensen, A. T., Weiss, D. J., Klausner, J. S., Laber, J., & Christie, D. J. (1994a). Detection of Antiplatelet Antibody With a Platelet Immunofluorescence Assay. *Journal of Veterinary Internal Medicine*, *8*(1), 36–39. <https://doi.org/10.1111/j.1939-1676.1994.tb03193.x>
124. Kristensen, A. T., Weiss, D. J., Klausner, J. S., Laber, J., & Christie, D. J. (1994b). Comparison of microscopic and flow cytometric detection of platelet antibody in dogs suspected of having immune-mediated thrombocytopenia. *American Journal of Veterinary Research*, *55*(8), 1111–1114.
125. Lachowicz, J. L., Post, G. S., Moroff, S. D., & Mooney, S. C. (2004). Acquired amegakaryocytic thrombocytopenia—Four cases and a literature review. *Journal of Small Animal Practice*, *45*(10), 507–514. <https://doi.org/10.1111/j.1748-5827.2004.tb00197.x>
126. Laing, E. J., Miller, C. W., & Cochrane, S. M. (1988). Treatment of cyclophosphamide-induced hemorrhagic cystitis in five dogs. *Journal of the American Veterinary Medical Association*, *193*(2), 233–236.
127. Langhorn, R., Bochsén, L., Willesen, J. L., Sørensen, T. M., & Kristensen, A. T. (2019). Thromboelastography-guided transfusion in dogs with hypocoagulable disorders: A case series. *Acta Veterinaria Scandinavica*, *61*(1), 35–42. <https://doi.org/10.1186/s13028-019-0469-x>
128. LaQuaglia, K. A., Robertson, J. B., & Lunn, K. F. (2021). Neutropenia in dogs receiving vincristine for treatment of presumptive immune-mediated thrombocytopenia. *Journal of Veterinary Internal Medicine*, *35*(1), 226–233. <https://doi.org/10.1111/jvim.16029>
129. Larkin, H. A., Collins, J. D., & Lambert, N. H. (1972). A fatal case of idiopathic thrombocytopaenic purpura in a dog. *Irish Veterinary Journal*, *26*(2), 25–28.
130. Laurenson, M. P., Hopper, K., Herrera, M. A., & Johnson, E. G. (2010). Concurrent Diseases and Conditions in Dogs with Splenic Vein Thrombosis: Splenic Vein Thrombosis in Dogs. *Journal of Veterinary Internal Medicine*, *24*(6), 1298–1304. <https://doi.org/10.1111/j.1939-1676.2010.0593.x>

131. Lavergne, S. N., & Trepanier, L. A. (2007). Anti-platelet antibodies in a natural animal model of sulphonamide-associated thrombocytopaenia. *Platelets*, *18*(8), 595–604. <https://doi.org/10.1080/09537100701392913>
132. Ledbetter, E. C., Riis, R. C., Kern, T. J., Haley, N. J., & Schatzberg, S. J. (2006). Corneal ulceration associated with naturally occurring canine herpesvirus-1 infection in two adult dogs. *Journal of the American Veterinary Medical Association*, *229*(3), 376–384. <https://doi.org/10.2460/javma.229.3.376>
133. Lee, J. S., Bellis, T. J., Yoskowitz, A. S., & Levitin, B. (2019). Acute onset tetraplegia associated with immune-mediated thrombocytopenia and suspected secondary intraspinal hemorrhage in a dog. *Clinical Case Reports*, *7*(9), 1673–1679. <https://doi.org/10.1002/ccr3.2295>
134. LeVine, D. N., Birkenheuer, A. J., Brooks, M. B., Nordone, S. K., Bellinger, D. A., Jones, S. L., Fischer, T. H., Oglesbee, S. E., Frey, K., Brinson, N. S., Peters, A. P., Marr, H. S., Motsinger-Reif, A., Gudbrandsdottir, S., Bussel, J. B., & Key, N. S. (2014). A novel canine model of immune thrombocytopenia: Has immune thrombocytopenia (ITP) gone to the dogs? *British Journal of Haematology*, *167*(1), 110–120. <https://doi.org/10.1111/bjh.13005>
135. LeVine, D. N., Cianciolo, R. E., Linder, K. E., Bizikova, P., Birkenheuer, A. J., Brooks, M. B., Salous, A. K., Nordone, S. K., Bellinger, D. A., Marr, H., Jones, S. L., Fischer, T. H., Deng, Y., Mazepa, M., & Key, N. S. (2019). Endothelial alterations in a canine model of immune thrombocytopenia. *Platelets*, *30*(1), 88–97. <https://doi.org/10.1080/09537104.2017.1378807>
136. Lewis, D. C., McVey, D. S., Shuman, W. S., & Muller, W. B. (1995). Development and characterization of a flow cytometric assay for detection of platelet-bound immunoglobulin G in dogs. *American Journal of Veterinary Research*, *56*(12), 1555–1558.
137. Lewis, D. C., & Meyers, K. M. (1994). Effect of anticoagulant and blood storage time on platelet-bound antibody concentrations in clinically normal dogs. *American Journal of Veterinary Research*, *55*(5), 602–605.
138. Lewis, D. C., & Meyers, K. M. (1996a). Studies of platelet-bound and serum platelet-bindable immunoglobulins in dogs with idiopathic thrombocytopenic purpura. *Experimental Hematology*, *24*(6), 696–701.
139. Lewis, D. C., & Meyers, K. M. (1996b). Canine Idiopathic Thrombocytopenic Purpura. *Journal of Veterinary Internal Medicine*, *10*(4), 207–218. <https://doi.org/10.1111/j.1939-1676.1996.tb02052.x>
140. Lewis, D. C., Meyers, K. M., Callan, M. B., Bücheler, J., & Giger, U. (1995). Detection of platelet-bound and serum platelet-bindable antibodies for diagnosis of idiopathic thrombocytopenic purpura in dogs. *Journal of the American Veterinary Medical Association*, *206*(1), 47–52.
141. Lewis, R. M., Schwartz, R., & Henry, W. B. (1965). Canine systemic lupus erythematosus. *Blood*, *25*(2), 143–160. <https://doi.org/10.1182/blood.V25.2.143.143>
142. Lo Piccolo, F., Busch, K., Palić, J., Geisen, V., Hartmann, K., & Unterer, S. (2019). Toxoplasma gondii-associated cholecystitis in a cat receiving immunosuppressive treatment. *Tierärztliche Praxis Ausgabe K: Kleintiere / Heimtiere*, *47*, 453–457. <https://doi.org/10.1055/a-1020-3775>

143. Mackin, A. J., Allen, D. G., & Johnston, I. B. (1995). Effects of vincristine and prednisone on platelet numbers and function in clinically normal dogs. *American Journal of Veterinary Research*, *56*(1), 100–108.
144. Magaña, A., Sánchez, F., Villa, K., Rivera, L., & Morales, E. (2015). Systemic neosporosis in a dog treated for immune-mediated thrombocytopenia and hemolytic anemia. *Veterinary Clinical Pathology*, *44*(4), 592–596. <https://doi.org/10.1111/vcp.12287>
145. Magne, M. L. (1996). Selective IgA deficiency in German Shepherd dogs. *Journal of Veterinary Allergy and Clinical Immunology*, *4*(1), 23–24.
146. Magrane, H. J., Magrane, W. G., & Ross, J. R. (1959). Idiopathic thrombocytopenic purpura in a dog—a case report. *Journal of the American Veterinary Medical Association*, *135*, 520–522.
147. Makielski, K. M., Brooks, M. B., Wang, C., Cullen, J. N., O'Connor, A. M., & LeVine, D. N. (2018). Development and implementation of a novel immune thrombocytopenia bleeding score for dogs. *Journal of Veterinary Internal Medicine*, *32*(3), 1041–1050. <https://doi.org/10.1111/jvim.15089>
148. Mandell, C. P., Jain, N. C., & Farver, T. B. (1989). The significance of normoblastemia and leukoerythroblastic reaction in the dog. *Journal of the American Animal Hospital Association*, *25*(6), 665–672.
149. Martin, D. M., Hall, J., Keirstead, N., & Lowe, A. (2006). Multifocal osteoma cutis in a golden retriever. *Canadian Veterinary Journal*, *47*, 360–362.
150. Martinez, C., Mooney, C. T., Shiel, R. E., Tang, P. K., Mooney, L., & O'Neill, E. J. (2019). Evaluation of red blood cell distribution width in dogs with various illnesses. *Canadian Veterinary Journal*, *60*, 694–671.
151. Maruyama, H., Yamagami, H., Watari, T., Kano, R., Fujino, Y., Tsujimoto, H., Hasegawa, A., & Kamata, H. (2009). Reticulated Platelet Levels in Whole Blood and Platelet-Rich Plasma of Dogs with Various Platelet Counts Measured by Flow Cytometry. *Journal of Veterinary Medical Science*, *71*(2), 195–197. <https://doi.org/10.1292/jvms.71.195>
152. Máthé, Á., Vörös, K., Papp, L., & Reiczigel, J. (2006). Clinical manifestations of canine babesiosis in Hungary (63 cases). *Acta Veterinaria Hungarica*, *54*(3), 367–385. <https://doi.org/10.1556/avet.54.2006.3.7>
153. Mazepa, A. W., Kidd, L. B., Young, K. M., & Trepanier, L. A. (2010). Clinical Presentation of 26 Anaplasma phagocytophilum-Seropositive Dogs Residing in an Endemic Area. *Journal of the American Animal Hospital Association*, *46*(6), 405–412. <https://doi.org/10.5326/0460405>
154. McAnulty, J. F., & Rudd, R. G. (1985). Thrombocytopenia associated with vaccination of a dog with a modified-live paramyxovirus vaccine. *Journal of the American Veterinary Medical Association*, *186*(11), 1217–1219.
155. McAtee, B. B., Cummings, K. J., Cook, A. K., Lidbury, J. A., Heseltine, J. C., & Willard, M. D. (2017). Opportunistic Invasive Cutaneous Fungal Infections Associated with Administration of Cyclosporine to Dogs with Immune-mediated Disease. *Journal of Veterinary Internal Medicine*, *31*(6), 1724–1729. <https://doi.org/10.1111/jvim.14824>
156. McVey, D. S., & Shuman, W. S. (1989). Detection of antiplatelet immunoglobulin in thrombocytopenic dogs. *Veterinary Immunology and Immunopathology*, *22*(2), 101–111. [https://doi.org/10.1016/0165-2427\(89\)90053-6](https://doi.org/10.1016/0165-2427(89)90053-6)

157. Mellor, P. J., Roulois, A. J. A., Day, M. J., Blacklaws, B. A., Knivett, S. J., & Herrtage, M. E. (2005). Neutrophilic dermatitis and immunemediated haematological disorders in a dog: Suspected adverse reaction to carprofen. *Journal of Small Animal Practice*, *46*(5), 237–242. <https://doi.org/10.1111/j.1748-5827.2005.tb00316.x>
158. Mezzano, D., Aranda, E., García, M. E., Pereira, J., Quiroga, T., & Pérez, M. (1992). Total sialic acid in human and canine platelets does not change with the platelet age. *American Journal of Hematology*, *40*(1), 5–11. <https://doi.org/10.1002/ajh.2830400103>
159. Mezzano, D., del Pino, G. E., Montesinos, M., García, M. E., Aranda, E., & Foradori, A. (1991). Platelet 5-Hydroxytryptamine Increases with Platelet Age in Dogs. *Thrombosis and Haemostasis*, *66*(2), 254–258. <https://doi.org/10.1055/s-0038-1646399>
160. Michimoto, T., Okamura, T., Suzuki, K., Watari, T., Kano, R., & Hasegawa, A. (2004). Thiazole Orange Positive Platelets in a Dog with Evans' Syndrome. *Journal of Veterinary Medical Science*, *66*(10), 1305–1306. <https://doi.org/10.1292/jvms.66.1305>
161. Middleton, S. M. (2005). Immune-mediated thrombocytopenia in a 4-month-old German shepherd dog. *Canadian Veterinary Journal*, *46*, 443–445.
162. Moraes, L. F., Takahira, R. K., Golim, M. de A., & Baggio, M. S. (2016). Avaliação das alterações hemostáticas e do risco tromboembólico em cães com AHIM. *Pesquisa Veterinária Brasileira*, *36*(5), 405–411. <https://doi.org/10.1590/S0100-736X2016000500009>
163. Morley, P., Mathes, M., Guth, A., & Dow, S. (2008). Anti-Erythrocyte Antibodies and Disease Associations in Anemic and Nonanemic Dogs. *Journal of Veterinary Internal Medicine*, *22*(4), 886–892. <https://doi.org/10.1111/j.1939-1676.2008.0112.x>
164. Murtaugh, R. J., & Jacobs, R. M. (1985). Suspected immune-mediated megakaryocytic hypoplasia or aplasia in a dog. *Journal of the American Veterinary Medical Association*, *186*(12), 1313–1315.
165. Mylonakis, M. E., Saridomichelakis, M. N., Lazaridis, V., Leontides, L. S., Kostoulas, P., & Koutinas, A. F. (2008). A retrospective study of 61 cases of spontaneous canine epistaxis (1998 to 2001). *Journal of Small Animal Practice*, *49*(4), 191–196. <https://doi.org/10.1111/j.1748-5827.2007.00441.x>
166. Nair, A. D. S., Cheng, C., Ganta, C. K., Sanderson, M. W., Alleman, A. R., Munderloh, U. G., & Ganta, R. R. (2016). Comparative Experimental Infection Study in Dogs with Ehrlichia canis, E. chaffeensis, Anaplasma platys and A. phagocytophilum. *PLOS ONE*, *11*(2), e0148239. <https://doi.org/10.1371/journal.pone.0148239>
167. Nakamura, R. K., Fenty, R. K., & Bianco, D. (2013). Presumptive immune-mediated thrombocytopenia secondary to massive Africanized bee envenomation in a dog: Africanized bee envenomation in a dog. *Journal of Veterinary Emergency and Critical Care*, *23*(6), 652–656. <https://doi.org/10.1111/vec.12120>
168. Nassiri, S. M., Chegeni, S., Rezaei, M., Mohammadi, E., & Izadi, S. (2010). Polycythemia vera-related MDS in a dog. *Comparative Clinical Pathology*, *19*(6), 627–630. <https://doi.org/10.1007/s00580-010-1074-6>
169. Neelawala, D., Dissanayake, D. R. A., Prasada, D. V. P., & Silva, I. D. (2021). Analysis of risk factors associated with recurrence of canine babesiosis caused by Babesia gibsoni. *Comparative Immunology, Microbiology and Infectious Diseases*, *74*, 101572. <https://doi.org/10.1016/j.cimid.2020.101572>

170. Nerhagen, S., Moberg, H. L., Boge, G. S., & Glanemann, B. (2021). Prednisolone-induced diabetes mellitus in the cat: A historical cohort. *Journal of Feline Medicine and Surgery*, 23(2), 175–180. <https://doi.org/10.1177/1098612X20943522>
171. Newton, P. L., & Manens, J. (2018). Successful treatment of disseminated neosporosis in an immune-suppressed dog. *Australian Veterinary Practitioner*, 48(2), 56–60.
172. Ng, Z. Y., Stokes, J. E., Alvarez, L., & Bartges, J. W. (2016). Cryopreserved platelet concentrate transfusions in 43 dogs: A retrospective study (2007-2013): Cryopreserved platelets concentrate in dogs. *Journal of Veterinary Emergency and Critical Care*, 26(5), 720–728. <https://doi.org/10.1111/vec.12503>
173. Niebauer, G. W. (1983). Ein Fall von autoimmuner Thrombozytopenie beim Hund und seine Behandlung mit Vincristin. *Wiener tierärztliche Monatsschrift*, 70(5), 170–172.
174. Norman, E. J. (2001). *Feline Platelets in Health and Disease and an Assessment of a New Anticoagulant to Minimise Pseudothrombocytopenia and Pseudoleukocytosis* [University of Glasgow]. <https://www.proquest.com/openview/11b3b43ad963cbaab1644f2cd1aa4a62/1?pq-origsite=gscholar&cbl=2026366&diss=y>
175. Northern, J., & Tvedten, H. W. (1992). Diagnosis of microthrombocytosis and immune-mediated thrombocytopenia in dogs with thrombocytopenia: 68 cases (1987-1989). *Journal of the American Veterinary Medical Association*, 200(3), 368–372.
176. Öberg, J., & Tvedten, H. (2010). Thromboelastography in a cat with steroid responsive thrombocytopenia. *Comparative Clinical Pathology*, 19(4), 429–431. <https://doi.org/10.1007/s00580-010-0978-5>
177. O'Brien, R. T., & Wood, E. F. (1998). Urinary Bladder Mural Hemorrhage Associated with Systemic Bleeding Disorders in Three Dogs. *Veterinary Radiology & Ultrasound*, 39(4), 354–356. <https://doi.org/10.1111/j.1740-8261.1998.tb01620.x>
178. Ohno, K., Uno, M., Suzuki, H., Masuda, K., & Tsujimoto, H. (2003). Canine Refractory Immune-mediated Thrombocytopenia Treated with Leflunomide. *Journal of the Japan Veterinary Medical Association*, 56(10), 669–672. <https://doi.org/10.12935/jvma1951.56.669>
179. Øines, Ø., Storli, K., & Brun-Hansen, H. (2010). First case of babesiosis caused by *Babesia canis canis* in a dog from Norway. *Veterinary Parasitology*, 171(3–4), 350–353. <https://doi.org/10.1016/j.vetpar.2010.03.024>
180. O'Marra, S. K., Delaforcade, A. M., & Shaw, S. P. (2011). Treatment and predictors of outcome in dogs with immune-mediated thrombocytopenia. *Journal of the American Veterinary Medical Association*, 238(3), 346–352. <https://doi.org/10.2460/javma.238.3.346>
181. O'Marra, S. K., Shaw, S. P., & deLaforcade, A. M. (2011). Investigating hypercoagulability during treatment for immune-mediated thrombocytopenia: A pilot study: Investigating hypercoagulability in ITP. *Journal of Veterinary Emergency and Critical Care*, 22(1), 126–130. <https://doi.org/10.1111/j.1476-4431.2011.00658.x>
182. O'Neill, E. J., Acke, E., Tobin, E., & McCarthy, G. (2010). Immune-mediated thrombocytopenia associated with angiostrongylus vasorum infection in a Jack Russell terrier. *Irish Veterinary Journal*, 63(7), 434. <https://doi.org/10.1186/2046-0481-63-7-434>
183. Orcutt, E. S., Lee, J. A., & Bianco, D. (2010). Immune-mediated hemolytic anemia and severe thrombocytopenia in dogs: 12 cases (2001-2008): Immune-mediated hemolytic

- anemia and thrombocytopenia in dogs. *Journal of Veterinary Emergency and Critical Care*, 20(3), 338–345. <https://doi.org/10.1111/j.1476-4431.2010.00540.x>
184. Paim, C. B., Paim, F. C., Da Silva, A. S., França, R. T., Costa, M. M., Leal, C. A. M., Soares, J. F., Labruna, M. B., Schetinger, M. R. C., Mazzanti, A., Mazzanti, C. M., Monteiro, S. G., & Lopes, S. T. A. (2012). Thrombocytopenia and platelet activity in dogs experimentally infected with *Rangelia vitalii*. *Veterinary Parasitology*, 185(2–4), 131–137. <https://doi.org/10.1016/j.vetpar.2011.09.039>
185. Pankraz, A., Bauer, N., & Moritz, A. (2009). Comparison of flow cytometry with the Sysmex XT2000iV automated analyzer for the detection of reticulated platelets in dogs. *Veterinary Clinical Pathology*, 38(1), 30–38. <https://doi.org/10.1111/j.1939-165X.2008.00086.x>
186. Paraš, G., Paraš, S., Lukač, B., Čegar, I., & Vitković, O. (2019). Idiopathic Thrombocytopenia in Dogs—Case Report. *ВЕТЕРИНАРСКИ ЖУРНАЛ РЕПУБЛИКЕ СРПСКЕ*, 19(1), 83–89. <https://doi.org/10.7251/VETJEN1901083P>
187. Park, H.-J., Kim, J.-W., Song, K.-H., & Seo, K.-W. (2015). Application of vincristine-loaded platelet therapy in three dogs with refractory immune-mediated thrombocytopenia. *Journal of Veterinary Science*, 16(1), 127–130. <https://doi.org/10.4142/jvs.2015.16.1.127>
188. Penhale, W., Day, M., Lines, A., & McKENNA, R. (1990). A review of cases submitted to Murdoch University for immunodiagnostic testing: 1978–1989. *Australian Veterinary Journal*, 67(4), 148–149. <https://doi.org/10.1111/j.1751-0813.1990.tb07737.x>
189. Peterson, M. E., Kintzer, P. P., & Hurvitz, A. I. (1988). Methimazole Treatment of 262 Cats With Hyperthyroidism. *Journal of Veterinary Internal Medicine*, 2(3), 150–157. <https://doi.org/10.1111/j.1939-1676.1988.tb02812.x>
190. Piek, C. J., Junius, G., Dekker, A., Schrauwen, E., Slappendel, R. J., & Teske, E. (2008). Idiopathic Immune-Mediated Hemolytic Anemia: Treatment Outcome and Prognostic Factors in 149 Dogs. *Journal of Veterinary Internal Medicine*, 22(2), 366–373. <https://doi.org/10.1111/j.1939-1676.2008.0060.x>
191. Pierce, K. R., Marrs, G. E., & Hightower, D. (1977). Acute canine ehrlichiosis: Platelet survival and factor 3 assay. *American Journal of Veterinary Research*, 38(11), 1821–1825.
192. Płoneczka-Janeczko, K., & Rypuła, K. (2011). Application of a flow cytometry in differentiation of antibodies accompanying platelets in Ehrlichia canis and Borrelia burgdorferi infections in dogs. *Central European Journal of Immunology*, 36(3), 174–179.
193. Polydoros, T., Ioannidi, O. M., Korsavidis, I., Stefanidis, S., Antoniadis, T., & Mylonakis, M. E. (2021). Romiplostim as Adjunctive Treatment of Refractory Amegakaryocytic Immune Thrombocytopenia in a Dog. *Topics in Companion Animal Medicine*, 42, 100488. <https://doi.org/10.1016/j.tcam.2020.100488>
194. Prihirunkit, K., Choothesa, A., Salakij, C., & Pisetpaisan, A. (2010). Immune-mediated hemolytic anemia in a dog with acute monoblastic leukemia. *Comparative Clinical Pathology*, 19(6), 631–634. <https://doi.org/10.1007/s00580-010-1092-4>
195. Putsche, J. C., & Kohn, B. (2008). Primary Immune-mediated Thrombocytopenia in 30 Dogs (1997–2003). *Journal of the American Animal Hospital Association*, 44(5), 250–257. <https://doi.org/10.5326/0440250>
196. Quorollo, B. A., Buch, J., Chandrashekar, R., Beall, M. J., Breitschwerdt, E. B., Yancey, C. B., Caudill, A. H., & Comyn, A. (2019). Clinicopathological findings in 41 dogs (2008–2018)

- naturally infected with *Ehrlichia ewingii*. *Journal of Veterinary Internal Medicine*, 33(2), 618–629. <https://doi.org/10.1111/jvim.15354>
197. Raguvaran, R., Mondal, R. S. K., & Mondal, D. B. (2019). Management of Immune Mediated Hemolytic Anemia (IMHA) Secondary to Paracetamol Toxicity in a Dog. *Intas Polivet*, 20(1), 180–181.
  198. Rakshit, S., Clark, D., Roy, K., & Datta, I. C. (2020). Immune-mediated hemolytic anemia in a cat: Diagnosis and treatment. *Haryana Veterinarian*, 59(2), 276–278.
  199. Ralph, A. G., Saunders, A. B., Hariu, C. D., & Nabity, M. (2011). Spontaneous echocardiographic contrast in three dogs: Spontaneous echocardiographic contrast in dogs. *Journal of Veterinary Emergency and Critical Care*, 21(2), 158–165. <https://doi.org/10.1111/j.1476-4431.2011.00624.x>
  200. Reimer, M. E., Troy, G. C., & Warnick, L. D. (1999). Immune-mediated hemolytic anemia: 70 cases (1988-1996). *Journal of the American Animal Hospital Association*, 35(5), 384–391. <https://doi.org/10.5326/15473317-35-5-384>
  201. Ridyard, A. E., Shaw, D. J., & Milne, E. M. (2010). Evaluation of platelet activation in canine immune-mediated haemolytic anaemia. *Journal of Small Animal Practice*, 51(6), 296–304. <https://doi.org/10.1111/j.1748-5827.2010.00935.x>
  202. Roseler, B. J. E., & Mason, K. V. (1994). Use of danazol and corticosteroids for the treatment of immune-mediated thrombocytopaenia in a dog. *Australian Veterinary Practitioner*, 24(3), 126–130.
  203. Roseler, B. J. E., & Mason, K. V. (1996). Use of danazol and corticosteroids for the treatment of immune-mediated thrombocytopenia in a dog. *Journal of Veterinary Allergy and Clinical Immunology*, 4(2), 53–56.
  204. Rozanski, E. A., Callan, M. B., Hughes, D., Sanders, N., & Giger, U. (2002). Comparison of platelet count recovery with use of vincristine and prednisone or prednisone alone for treatment for severe immune-mediated thrombocytopenia in dogs. *Journal of the American Veterinary Medical Association*, 220(4), 477–481. <https://doi.org/10.2460/javma.2002.220.477>
  205. Saastamoinen, J., Rutter, C. R., & Jeffery, U. (2019). Subconjunctival haemorrhage in 147 dogs. *Journal of Small Animal Practice*, 60(12), 755–760. <https://doi.org/10.1111/jsap.13081>
  206. Saberi, M., Akhtardanesh, B., & Mohebbi, E. (2012). Treatment of Evan's syndrome by leflunomide and desmopressin in a mixed-breed dog. *Comparative Clinical Pathology*, 21(4), 485–488. <https://doi.org/10.1007/s00580-012-1510-x>
  207. Sakai, H., Tamura, S., & Sakai, K. (2014). Amegakaryocytic thrombocytopenia in a dog. *Journal of Animal Clinical Medicine*, 23(1), 34–37.
  208. Sangeetha, S. G., Ajith, Y., Dixit, S. K., & Reena, K. K. (2017). PCR Based Diagnosis and Clinical Management of Ehrlichiosis in a Dog. *Intas Polivet*, 18(1), 187–191.
  209. Santoro, S. K., Garrett, L. D., & Wilkerson, M. (2007). Platelet Concentrations and Platelet-Associated IgG in Greyhounds. *Journal of Veterinary Internal Medicine*, 21(1), 107–112. <https://doi.org/10.1111/j.1939-1676.2007.tb02935.x>
  210. Sato, M., Veir, J. K., Shropshire, S. B., & Lappin, M. R. (2020). *Ehrlichia canis* in dogs experimentally infected, treated, and then immune suppressed during the acute or



- subclinical phases. *Journal of Veterinary Internal Medicine*, 34(3), 1214–1221.  
<https://doi.org/10.1111/jvim.15750>
211. Schoeman, T., Lobetti, R. G., Jacobson, L. S., & Penzhorn, B. L. (2001). Feline babesiosis: Signalment, clinical pathology and concurrent infections. *Journal of the South African Veterinary Association*, 72(1), 4–11. <https://doi.org/10.4102/jsava.v72i1.601>
212. Schwartz, D., Sharkey, L., Armstrong, P. J., Knudson, C., & Kelley, J. (2014). Platelet Volume and Plateletcrit in Dogs with Presumed Primary Immune-Mediated Thrombocytopenia. *Journal of Veterinary Internal Medicine*, 28(5), 1575–1579.  
<https://doi.org/10.1111/jvim.12405>
213. Scott, M. A., Kaiser, L., Davis, J. M., & Schwartz, K. A. (2002). Development of a sensitive immunoradiometric assay for detection of platelet surface-associated immunoglobulins in thrombocytopenic dogs. *American Journal of Veterinary Research*, 63(1), 124–129.  
<https://doi.org/10.2460/AJVR.2002.63.124>
214. Scott, T. N., Bailin, H. G., Jutkowitz, L. A., Scott, M. A., & Lucidi, C. A. (2021). Bone marrow, blood, and clinical findings in dogs treated with phenobarbital. *Veterinary Clinical Pathology*, 50(1), 122–131. <https://doi.org/10.1111/vcp.13013>
215. Scott-Moncrieff, J., Treadwell, N., McCullough, S., & Brooks, M. (2001). Hemostatic abnormalities in dogs with primary immune-mediated hemolytic anemia. *Journal of the American Animal Hospital Association*, 37(3), 220–227. <https://doi.org/10.5326/15473317-37-3-220>
216. Scuderi, M. A., Snead, E., Mehain, S., Waldner, C., & Epp, T. (2016). Outcome based on treatment protocol in patients with primary canine immune-mediated thrombocytopenia: 46 cases (2000-2013). *Canadian Veterinary Journal*, 57, 514–518.
217. Sekiguchi, T., Vigani, A., Ripoll, A. Z., Taylor, S., Culler, C., & Suter, S. E. (2020). Clinical Application of Apheresis in Very Small Dogs Weighing <8 kg to Pediatric Patients. *Therapeutic Apheresis and Dialysis*, 24(3), 333–342. <https://doi.org/10.1111/1744-9987.13432>
218. Şentürk, S., & Temizel, M. (2001). Bir Köpekte İmmün İlişkili Hemolitik Anemi ve Trombositopenin Vincristine ile Tedavisi. *Veteriner Fakültesi Dergisi, Uludağ Üniversitesi*, 20(3), 85–91.
219. Şentürk, S., Temizel, M., Cihan, H., & Aytuğ, N. (2010). Comparison of the effects of Prednisolon, Danazol and Testosteron propionat therapy in dogs with immune mediated hemolytic anemia and thrombocytopenia. *Veteriner Fakültesi Dergisi, Uludağ Üniversitesi*, 29(2), 57–63.
220. Shropshire, S., Dow, S., & Lappin, M. (2018). Validation of a clinically applicable flow cytometric assay for the detection of immunoglobulin associated platelets in dogs. *Veterinary Immunology and Immunopathology*, 202, 109–114.  
<https://doi.org/10.1016/j.vetimm.2018.07.003>
221. Shropshire, S., Dow, S., & Lappin, M. (2020). Detection and dynamics of anti-platelet antibodies in thrombocytopenic dogs with and without idiopathic immune thrombocytopenia. *Journal of Veterinary Internal Medicine*, 34(2), 700–709.  
<https://doi.org/10.1111/jvim.15737>

222. Shropshire, S., Olver, C., & Lappin, M. (2018). Characteristics of hemostasis during experimental *Ehrlichia canis* infection. *Journal of Veterinary Internal Medicine*, 32(4), 1334–1342. <https://doi.org/10.1111/jvim.15130>
223. Silva, L. F. N., Golim, M. A., & Takahira, R. K. (2012). Measurement of thrombopoietic activity through the quantification of megakaryocytes in bone marrow cytology and reticulated platelets. *Research in Veterinary Science*, 93(1), 313–317. <https://doi.org/10.1016/j.rvsc.2011.07.005>
224. Silva, M. C., Pereira, M., & Márquez, A. G. (1995). Remission in three cases of immune-mediated thrombocytopenia in dogs treated with glucocorticoids. *Revista de Medicina Veterinaria (Buenos Aires)*, 76(5), 306–308.
225. Simpson, K., Chapman, P., & Klag, A. (2018). Long-term outcome of primary immune-mediated thrombocytopenia in dogs. *Journal of Small Animal Practice*, 59(11), 674–680. <https://doi.org/10.1111/jsap.12912>
226. Singh, M., & Lamb, W. (2005). Idiopathic thrombocytopenia in Cavalier King Charles Spaniels. *Australian Veterinary Journal*, 83(11), 700–703. <https://doi.org/10.1111/j.1751-0813.2005.tb13055.x>
227. Singh, T. P., & Pangawkar, G. R. (1998). Haemostatic disorders in dogs infected with transmissible venereal tumour. *Indian Veterinary Journal*, 75(10), 879–881.
228. Smith, C., & Tappin, S. (2012). Evans Syndrome (immune-mediated haemolytic anaemia with immune-mediated thrombocytopenia) in a three-year-old male neutered Springer Spaniel. *Companion Animal*, 17(4), 31–35. <https://doi.org/10.1111/j.2044-3862.2012.00178.x>
229. Smith, J. R., Smith, K. F., & Brainard, B. M. (2014). Platelet parameters from an automated hematology analyzer in dogs with inflammatory clinical diseases. *The Veterinary Journal*, 201(3), 406–411. <https://doi.org/10.1016/j.tvjl.2014.07.009>
230. Smith, J., Schaer, M., & Chandra, S. (1999). Chronic thrombocytopenia and epistaxis in a cat. *Feline Practice*, 27(3), 5–9.
231. Snead, E., Vargo, C., & Myers, S. (2011). Glucocorticoid-dependent hypoadrenocorticism with thrombocytopenia and neutropenia mimicking sepsis in a Labrador retriever dog. *Canadian Veterinary Journal*, 52, 1129–1134.
232. Souza, A., Pereira, J., Campos, S., Torres-Filho, R., Xavier, M., Bacellar, D., & Almosny, N. (2016). Platelet indices in dogs with thrombocytopenia and dogs with normal platelet counts. *Archivos de Medicina Veterinaria*, 48(3), 277–281. <https://doi.org/10.4067/S0301-732X2016000300005>
233. Sugar, N., Paitan, Y., Merhavi, N., Aroch, I., & Kelmer, E. (2018). Erysipelothrix rhusiopathiae infectious endocarditis and putative secondary immune mediated hemolytic anemia and thrombocytopenia in a dog, and a literature review. *Israel Journal of Veterinary Medicine*, 73(4), 30–38.
234. Sullivan, P. S., Arrington, K., West, R., & McDonald, T. P. (1992). Thrombocytopenia associated with administration of trimethoprim/sulfadiazine in a dog. *Journal of the American Veterinary Medical Association*, 201(11), 1741–1744.
235. Sundburg, C. R., Belanger, J. M., Bannasch, D. L., Famula, T. R., & Oberbauer, A. M. (2016). Gonadectomy effects on the risk of immune disorders in the dog: A retrospective study. *BMC Veterinary Research*, 12(1), 278. <https://doi.org/10.1186/s12917-016-0911-5>

236. Takahashi, Y., Hirakawa, A., Yamamoto, N., Tanaka, M., Yoshida, M., Kuwahara, K., Ura, A., Anami, T., & Doumori, A. (2015). Two Canine Cases with Immune-mediated Thrombocytopenia Which Had Maintained Remission by Administration of Leflunomide. *Journal of Animal Clinical Medicine*, *24*(3), 132–137. <https://doi.org/10.11252/dobutsurinshoigaku.24.132>
237. Tamí, I., Martínez, J. I., Tamí, M., Redondo, M. C., Finol, H., & Simonovis, N. (1996). Identification of Ehrlichia Species in Blood Smear: *Infectious Diseases in Clinical Practice*, *5*(9), 555–557. <https://doi.org/10.1097/00019048-199612000-00011>
238. Tappin, S. (2007). Immune mediated thrombocytopenia in a 2-year-old Lurcher. *UK Vet: Companion Animal*, *12*(6), 37–43.
239. Tasker, S., Mackin, A. J., & Day, M. J. (1999). Primary immune-mediated thrombocytopenia in a cat. *Journal of Small Animal Practice*, *40*(3), 127–131. <https://doi.org/10.1111/j.1748-5827.1999.tb03054.x>
240. Terrazzano, G., Cortese, L., Piantedosi, D., Zappacosta, S., Di Loria, A., Santoro, D., Ruggiero, G., & Ciaramella, P. (2006). Presence of anti-platelet IgM and IgG antibodies in dogs naturally infected by *Leishmania infantum*. *Veterinary Immunology and Immunopathology*, *110*(3–4), 331–337. <https://doi.org/10.1016/j.vetimm.2005.11.001>
241. Theilen, G. (1997). Possible relationships between canine hematopoietic neoplasia, other malignancies and immune mediated diseases. *Leukemia (Basingstoke)*, *11*(S3), 187–188.
242. Tsuchiya, R. (2004). Study of intravenous IgG therapy for dogs with immune-mediated thrombocytopenia. *Journal of Azabu University*, *9/10*, 188–190.
243. Tsuchiya, R., Komatsu, T., Ishikawa, T., Neo, S., Mcconnell, M. F., Hisasue, M., & Yamada, T. (2010). Preparation of Positive Control Platelets for Detection of Canine Platelet Surface-Associated IgG, IgM and Complement (C3) by Flow Cytometry. *Journal of Veterinary Medical Science*, *72*(8), 1063–1066. <https://doi.org/10.1292/jvms.09-0405>
244. Vargo, C. L., Taylor, S. M., & Haines, D. M. (2007). *Immune mediated neutropenia and thrombocytopenia in 3 giant schnauzers*. *48*(11), 1159–1163.
245. Vasilopoulos, R. J., Mackin, A., Lavergne, S. N., & Trepanier, L. A. (2005). Nephrotic syndrome associated with administration of sulfadimethoxine/ ormetoprim in a doberman. *Journal of Small Animal Practice*, *46*(5), 232–236. <https://doi.org/10.1111/j.1748-5827.2005.tb00315.x>
246. Vazquez, L. (2018). Primary immune mediated thrombocytopenia in a Dachshund. *Point Vétérinaire*, *49*(388), 54–60.
247. Vijayalakshmi, P., Srinivasan, S. R., Vairamuthu, S., Mangalagowri, A., Latha, B. R., & Nambi, A. P. (2014). Clinico pathological features in dogs associated with babesiosis. *Indian Veterinary Journal*, *91*(4), 21–24.
248. Violette, N. P., & Ledbetter, E. C. (2017). Intracorneal stromal hemorrhage in dogs and its associations with ocular and systemic disease: 39 cases. *Veterinary Ophthalmology*, *20*(1), 27–33. <https://doi.org/10.1111/vop.12340>
249. Volkmann, M., Hepworth, M. R., Ebner, F., Rausch, S., Kohn, B., & Hartmann, S. (2014). Frequencies of regulatory T cells in the peripheral blood of dogs with primary immune-mediated thrombocytopenia and chronic enteropathy: A pilot study. *The Veterinary Journal*, *202*(3), 630–633. <https://doi.org/10.1016/j.tvjl.2014.10.012>

250. Waldrop, J. E., Rozanski, E. A., Freeman, L. M., & Rush, J. E. (2003). Packed Red Blood Cell Transfusions in Dogs With Gastrointestinal Hemorrhage: 55 Cases (1999–2001). *Journal of the American Animal Hospital Association*, 39(6), 523–527. <https://doi.org/10.5326/0390523>
251. Walton, M. B., Mardell, E., Spoor, M., & Innes, J. (2014). Lameness associated with tarsal haemarthrosis as the sole clinical sign of idiopathic immune-mediated thrombocytopenia in a dog. *Veterinary and Comparative Orthopaedics and Traumatology*, 27(06), 491–495. <https://doi.org/10.3415/VCOT-14-03-0041>
252. Waner, T., Harrus, S., Weiss, D. J., Bark, H., & Keysary, A. (1995). Demonstration of serum antiplatelet antibodies in experimental acute canine ehrlichiosis. *Veterinary Immunology and Immunopathology*, 48(1–2), 177–182. [https://doi.org/10.1016/0165-2427\(95\)05420-B](https://doi.org/10.1016/0165-2427(95)05420-B)
253. Waner, T., Leykin, I., Shinitsky, M., Sharabani, E., Buch, H., Keysary, A., Bark, H., & Harrus, S. (2000). Detection of platelet-bound antibodies in beagle dogs after artificial infection with *Ehrlichia canis*. *Veterinary Immunology and Immunopathology*, 77, 145–150.
254. Waner, T., & Lurie, S. (1992). Aspirin implicated immune-mediated haemolytic anaemia and thrombocytopenia in a dog—A case report. *Israel Journal of Veterinary Medicine*, 47(3), 112–115.
255. Wataru, T., Tsujimoto, H., Ono, K., & Hasegawa, A. (1998). Platelet Aggregation in Canine Idiopathic Thrombocytopenic Purpura. *Journal of the Japan Veterinary Medical Association*, 51(6), 309–312. <https://doi.org/10.12935/jvma1951.51.309>
256. Wayne, J. W. (1960). Idiopathic thrombocytopenic purpura in a dog. *Canadian Veterinary Journal*, 1(12), 569–571.
257. Weingart, C., Thielemann, D., & Kohn, B. (2019). Primary immune-mediated haemolytic anaemia: A retrospective long-term study in 61 dogs. *Australian Veterinary Journal*, 97(12), 483–489. <https://doi.org/10.1111/avj.12875>
258. Weiss, D. J. (2007). Acute bone marrow stromal injury in the dog. *Comparative Clinical Pathology*, 16(4), 223–228. <https://doi.org/10.1007/s00580-007-0698-7>
259. Weiss, D. J., & Aird, B. (2001). Cytologic Evaluation of Primary and Secondary Myelodysplastic Syndromes in the Dog. *Veterinary Clinical Pathology*, 30(2), 67–75. <https://doi.org/10.1111/j.1939-165X.2001.tb00261.x>
260. Weiss, D. J., & Henson, M. (2007). Pure white cell aplasia in a dog. *Veterinary Clinical Pathology*, 36(4), 373–375. <https://doi.org/10.1111/j.1939-165X.2007.tb00445.x>
261. Weiss, D. J., & Townsend, E. (1998). Evaluation of reticulated platelets in dogs. *Comparative Haematology International*, 8(3), 166–170. <https://doi.org/10.1007/BF02642508>
262. Weiss, Douglas J. (2004). Selective dysmegakaryopoiesis in thrombocytopenic dogs (1996–2002). *Comparative Clinical Pathology*, 13, 24–28. <https://doi.org/10.1007/s00580-004-0515-5>
263. Wilkerson, M. J., & Shuman, W. (2001). Alterations in Normal Canine Platelets During Storage in EDTA Anticoagulated Blood. *Veterinary Clinical Pathology*, 30(3), 107–113. <https://doi.org/10.1111/j.1939-165X.2001.tb00417.x>
264. Wilkerson, M. J., Shuman, W., Swist, S., Harkin, K., Meinkoth, J., & Kocan, A. A. (2001). Platelet Size, Platelet Surface-Associated IgG, and Reticulated Platelets in Dogs with

- Immune-Mediated Thrombocytopenia. *Veterinary Clinical Pathology*, 30(3), 141–149. <https://doi.org/10.1111/j.1939-165X.2001.tb00423.x>
265. Wilkins, R. J., Hurvitz, A. I., & Dodds-Laffin, W. J. (1973). Immunologically mediated thrombocytopenia in the dog. *Journal of the American Veterinary Medical Association*, 163(3), 277–282.
266. Williams, D. A., & Maggio-Price, L. (1984). Canine idiopathic thrombocytopenia: Clinical observations and long-term follow-up in 54 cases. *Journal of the American Veterinary Medical Association*, 185(6), 660–663.
267. Wondratschek, C., Weingart, C., & Kohn, B. (2010). Primary Immune-Mediated Thrombocytopenia in Cats. *Journal of the American Animal Hospital Association*, 46(1), 12–19. <https://doi.org/10.5326/0460012>
268. Woods, J. P., Johnstone, I. B., Bienzle, D., Balson, G., & Gartley, C. J. (1995). Concurrent lymphangioma, immune-mediated thrombocytopenia, and von Willebrand's disease in a dog. *Journal of the American Animal Hospital Association*, 31(1), 70–76. <https://doi.org/10.5326/15473317-31-1-70>
269. Worthing, K. A., Norris, J. M., & Briscoe, K. A. (2019). Severe acute cellulitis and sepsis caused by *Aeromonas* spp. In a dog on immunosuppressive therapy. *Journal of Veterinary Emergency and Critical Care*, 29(4), 444–449. <https://doi.org/10.1111/vec.12867>
270. Yau, V. K., & Bianco, D. (2014). Treatment of five haemodynamically stable dogs with immune-mediated thrombocytopenia using mycophenolate mofetil as single agent. *Journal of Small Animal Practice*, 55(6), 330–333. <https://doi.org/10.1111/jsap.12203>
271. Zenker, I., Keller, L., Meichner, K., Unterer, S., & Hartmann, K. (2009). Immune mediated destruction of platelets in dogs with heat stroke: A prospective study. *Tierärztliche Praxis Ausgabe K: Kleintiere / Heimtiere*, 37(K), 314–318. <https://doi.org/10.1055/s-0038-1622811>
272. Zini, E., Hauser, B., Meli, M. L., & Glaus, T. M. (2007). Immune-mediated erythroid and megakaryocytic aplasia in a cat. *Journal of the American Veterinary Medical Association*, 230(7), 1024–1027. <https://doi.org/10.2460/javma.230.7.1024>
273. Zygnier, W., Gójska-Zygnier, O., & Szmiedt, K. (2011). Vincristine and cyclophosphamide in the treatment of persistent anemia and thrombocytopenia related to *Babesia canis* infection in dog. *Zycie Weterynaryjne*, 86(5), 374–378.

#### Studies identified via evidence evaluator knowledge

274. Brooks, M. B., Maruyama, H., Cremer, S. E., Goggs, R., Forman, M. A., Koch, M., Merriam, J., Makielski, K., Viall, A., & LeVine, D. N. (2022). Preliminary evaluation of a flow cytometric assay with microsphere controls for the detection of platelet-bound antibodies in canine immune thrombocytopenia. *Veterinary Clinical Pathology*, 51(3), 330–338. <https://doi.org/10.1111/vcp.13093>
275. Miller, M. D., & Lunn, K. F. (2007). Diagnostic use of cytologic examination of bone marrow from dogs with thrombocytopenia: 58 cases (1994–2004). *Journal of the American Veterinary Medical Association*, 231(10), 1540–1544. <https://doi.org/10.2460/javma.231.10.1540>

276. Peterson, J. L., Couto, C. G., & Wellman, M. L. (1995). Hemostatic Disorders in Cats: A Retrospective Study and Review of the Literature. *Journal of Veterinary Internal Medicine*, 9(5), 298–303. <https://doi.org/10.1111/j.1939-1676.1995.tb01088.x>
277. Sullivan, P. S., Manning, K. L., & McDonald, T. P. (1995). Association of mean platelet volume and bone marrow megakaryocytopoiesis in thrombocytopenic dogs: 60 cases (1984-1993). *Journal of the American Veterinary Medical Association*, 206(3), 332–334.
278. Thomas, J. S., & Green, R. A. (1998). Clotting times and antithrombin III activity in cats with naturally developing diseases: 85 cases (1984-1994). *Journal of the American Veterinary Medical Association*, 213(9), 1290–1295.

#### Studies identified via Scopus forward citation searching

279. Bommer, N. X., Shaw, D. J., Milne, E. M., & Ridyard, A. E. (2008). Platelet distribution width and mean platelet volume in the interpretation of thrombocytopenia in dogs. *Journal of Small Animal Practice*, 49(10), 518–524. <https://doi.org/10.1111/j.1748-5827.2008.00636.x>
280. Bulla, C., Takahira, R. K., Jr, J. P. A., AparecidaTrinca, L., Lopes, R. S., & Wiedmeyer, C. E. (2004). The relationship between the degree of thrombocytopenia and infection with Ehrlichia canis in an endemic area. *Veterinary Research*, 35(1), 141–146. <https://doi.org/10.1051/vetres:2003038>
281. Cockburn, C., & Troy, G. C. (1986). A retrospective study of sixty-two cases of thrombocytopenia in the dog. *Southwestern Veterinarian*, 37(2), 133–141.
282. Grindem, C. B., Breitschwerdt, E. B., Corbett, W. T., Page, R. L., & Jans, H. E. (1994). Thrombocytopenia Associated With Neoplasia in Dogs. *Journal of Veterinary Internal Medicine*, 8(6), 400–405. <https://doi.org/10.1111/j.1939-1676.1994.tb03258.x>
283. Jordan, H. L., Grindem, C. B., & Breitschwerdt, E. B. (1993). Thrombocytopenia in Cats: A Retrospective Study of 41 Cases. *Journal of Veterinary Internal Medicine*, 7(5), 261–265. <https://doi.org/10.1111/j.1939-1676.1993.tb01017.x>
284. Żmigrodzka, M., Guzera, M., & Winnicka, A. (2014). Evaluation of reticulated platelets in dogs with breed-related thrombocytopenia. *Polish Journal of Veterinary Sciences*, 17(1), 137–142. <https://doi.org/10.2478/pjvs-2014-0018>

#### Studies identified via targeted PubMed searching

285. Estrin, M. A., Wehausen, C. E., Jessen, C. R., & Lee, J. A. (2006). Disseminated Intravascular Coagulation in Cats. *Journal of Veterinary Internal Medicine*, 20(6), 1334–1339.
286. Lewis, D., Bruyette, D., Kellerman, D., & Smith, S. (1997). Thrombocytopenia in dogs with anticoagulant rodenticide-induced hemorrhage: Eight cases (1990-1995). *Journal of the American Animal Hospital Association*, 33(5), 417–422. <https://doi.org/10.5326/15473317-33-5-417>
287. Tvedten, H., Lilliehöök, I., Hillström, A., & Häggström, J. (2008). Plateletcrit is superior to platelet count for assessing platelet status in Cavalier King Charles Spaniels. *Veterinary Clinical Pathology*, 37(3), 266–271. <https://doi.org/10.1111/j.1939-165X.2008.00054.x>
